# Supplementary material for: Identification of core differentially methylated genes in glioma
Source: PubMed Central journal article supplement — Oncol Lett. 2019 Oct 2;18(6):6033–45. doi: 10.3892/ol.2019.10955 (PMC6864971; doi:10.3892/ol.2019.10955), 2019-10-02
Supplement: Supplementary_Data.pdf [file Supplementary_Data.pdf]

Table S1. Differentially methylated genes associated with glioma (N=349).

| ID                 | Gene name   | adj.P.Val              | P-value                | t      | B       | logFC  | Sequence                                                  |
|--------------------|-------------|------------------------|------------------------|--------|---------|--------|-----------------------------------------------------------|
| FZD9_E458_F        | FZD9        | 1.26x10 <sup>-12</sup> | 1.09x10 <sup>-14</sup> | 9.1509 | 22.9269 | 0.7041 | GCGGTGCCGAGCTAGCGGAGTTCG CG CCGCTGGTGCAGTACGGGTGCC        |
| HOXA11_P698_F      | HOXA11      | 7.30x10 <sup>-06</sup> | 3.01x10 <sup>-07</sup> | 5.5147 | 6.0870  | 0.5690 | TCATTCATGTCACTCCGAAG CG TTTAGTGCCTCCGTCCTAAACC            |
| TES_P182_F         | TES         | 1.77x10 <sup>-08</sup> | 2.82x10 <sup>-10</sup> | 7.0532 | 12.9087 | 0.5577 | GGCCCGTGGACGCCAGAGATCCCT CG GAGACCAGGTCAGGTCAGT           |
| HOXA9_E252_R       | HOXA9       | 3.33x10 <sup>-04</sup> | 2.33x10 <sup>-05</sup> | 4.4514 | 1.8825  | 0.5375 | TGGTTCCACGAGGGCCAAACACCGT CG CTTGGACTGGAAGTGCACC          |
| CD81_P272_R        | CD81        | 1.45x10 <sup>-07</sup> | 3.18x10 <sup>-09</sup> | 6.5334 | 10.5300 | 0.5188 | ACGTGCATGCTGCTCAGGGG CG CCAGCTTCCGGTCGGAGTTGACCT          |
| TNFRSF10A_P171_F   | TNFRSF10A   | 2.54x10 <sup>-07</sup> | 6.07x10 <sup>-09</sup> | 6.3925 | 9.8968  | 0.5030 | TCGTTTGGCCACTTGGTCCAG CG CCAGGCTTCCGGTCGGAGTTGACCT        |
| TAL1_P594_F        | TAL1        | 9.71x10 <sup>-04</sup> | 9.10x10 <sup>-05</sup> | 4.0883 | 0.5783  | 0.4672 | TCACACATCGAAGTCTTGGATTA CTG CG JAAAGGCTCCTTATTTGCCCGGGCTT |
| FLT3_E326_R        | FLT3        | 3.36x10 <sup>-03</sup> | 4.16x10 <sup>-04</sup> | 3.6589 | -0.8627 | 0.4583 | CGGGCCGAGCCAGAGGAGACTT CG GAGAAAGGGAAGAGGAC               |
| AHR_P166_R         | AHR         | 1.18x10 <sup>-02</sup> | 2.08x10 <sup>-03</sup> | 3.1656 | -2.3667 | 0.4569 | TTGCCATGCACGAAGATGGTACC CG G GGGGGGGGGGCTTACGTCCTACGTC    |
| MEST_E150_F        | MEST        | 5.63x10 <sup>-04</sup> | 4.49x10 <sup>-05</sup> | 4.2785 | 1.2523  | 0.4343 | TCAGGAAGCCATGGCAACCGGTT CT CG JAAACATGGAGTCTGTAGGCAAGG    |
| IRAK3_E130_F       | IRAK3       | 8.27x10 <sup>-03</sup> | 1.29x10 <sup>-03</sup> | 3.3171 | -1.9228 | 0.4338 | GCACACGCTGCTGTTGACCTG CCCGCCCG CG JCTGCTGGAGAGCTCTGGCT    |
| PENK_E26_F         | PENK        | 4.33x10 <sup>-03</sup> | 5.93x10 <sup>-04</sup> | 3.5542 | -1.1959 | 0.4330 | TTCGAGCCTGCTGGGGCAGAA CG GGGTCCTCGGCAGGACCCCTC            |
| MOS_E60_R          | MOS         | 2.75x10 <sup>-03</sup> | 3.10x10 <sup>-04</sup> | 3.7441 | -0.5860 | 0.4222 | GAGGACTGCTGCAGGGCCCG CG TCCACCAGTGGGGA AAAACTCG           |
| MYCL2_P19_F        | MYCL2       | 6.35x10 <sup>-03</sup> | 9.49x10 <sup>-04</sup> | 3.4121 | -1.6363 | 0.4182 | GGAACTAGTCTGCTCCAGGTGGCAAGCT G JTAGCAAGCAAGCAACATGGAC     |
|                    |             |                        |                        |        |         |        | CGCG                                                      |
| NEFL_P209_R        | NEFL        | 9.76x10 <sup>-03</sup> | 1.61x10 <sup>-03</sup> | 3.2466 | -2.1315 | 0.4178 | GGGGCAGCCGCTGCTGCAGCCAAAGG CG JAGGATTCGCGCAAAAAGGGA       |
| NPY_P295_F         | NPY         | 5.77x10 <sup>-03</sup> | 8.35x10 <sup>-04</sup> | 3.4511 | -1.5170 | 0.3954 | GAAGGAAGAAGAAAGCAGGGAT CG GGCAGTCCCGCAGGGCAGATACT         |
| GATA6_P726_F       | GATA6       | 1.10x10 <sup>-02</sup> | 1.87x10 <sup>-03</sup> | 3.1998 | -2.2681 | 0.3928 | GGGACATCAAAAGTTGGAGAGCGTCT CG GACACGACTGATGTGGAAGCC       |
| TNFRSF10D_E27_F    | TNFRSF10D   | 1.31x10 <sup>-02</sup> | 2.38x10 <sup>-03</sup> | 3.1224 | -2.4901 | 0.3849 | CAGAAATCGTCCCGTAGTTGT CG CGTGC AAAGTTCTCGCAGCTACACTGCCA   |
| DSC2_E90_F         | DSC2        | 1.21x10 <sup>-02</sup> | 2.17x10 <sup>-03</sup> | 3.1527 | -2.4038 | 0.3824 | CTGGCAAGGTGTTTCTACCAAG CG GACGCCACCATAAAGGCCAATCTC        |
| HOXA5_E187_F       | HOXA5       | 5.79x10 <sup>-03</sup> | 8.43x10 <sup>-04</sup> | 3.4481 | -1.5259 | 0.3789 | CATTGTAGCCGTAGCCGTACCTG CG GAGTGCATGCTGCCGAGTCCCTGAATT    |
| ALOX12_E85_R       | ALOX12      | 1.32x10 <sup>-02</sup> | 2.43x10 <sup>-03</sup> | 3.1148 | -2.5117 | 0.3712 | GGGGCTGGCTTCTTCCGGG CG JACAACCCGCTGCAGCTTGGCTGGTCTCGG     |
| ISL1_P379_F        | ISL1        | 1.64x10 <sup>-02</sup> | 3.49x10 <sup>-03</sup> | 2.9961 | -2.8434 | 0.3687 | GCGGGACCCAGGAGCCAGG CG GAGGAGCAGCCACAGGAGGC               |
| TFAP2C_P765_F      | TFAP2C      | 2.34x10 <sup>-02</sup> | 5.42x10 <sup>-03</sup> | 2.8464 | -3.2461 | 0.3683 | GGCCGCCAGAGGCAGCTGCAGAGCCGG CG TCCGCAAGGCAAGGCAAGG        |
| PCTK1_E77_R        | PCTK1       | 2.27x10 <sup>-07</sup> | 5.13x10 <sup>-09</sup> | 6.4295 | 10.0626 | 0.3567 | ATAACTCTTCAGGCTGCTCTCT CG JAAAAGTCAICTTCTCGCGAACCTTTAA    |
| GFI1_P45_R         | GFI1        | 1.39x10 <sup>-02</sup> | 2.66x10 <sup>-03</sup> | 3.0864 | -2.5921 | 0.3540 | GCTCTGACCCGGTCCGCTCAGCC CG JACTAAATTCGCGTGGTCTCGGA        |
| DIO3_E230_R        | DIO3        | 4.30x10 <sup>-07</sup> | 1.18x10 <sup>-08</sup> | 6.2476 | 9.2509  | 0.3489 | GGCTGCAGCCACCAGTCTC CG CTCCCTGCTGCTTCACTCCCTTGAGGCTC      |
| DDIT3_P1313_R      | DDIT3       | 1.71x10 <sup>-03</sup> | 1.75x10 <sup>-04</sup> | 3.9067 | -0.0452 | 0.3427 | GGTTCGAGATTTACAGCGGAGTCTCATCC CG GGACGTGTGAGTGCACCTTCAGC  |
| HTR1B_P107_F       | HTR1B       | 5.24x10 <sup>-06</sup> | 1.99x10 <sup>-07</sup> | 5.6107 | 6.4908  | 0.3423 | GGTTTGTCCCCAGTTGATAGTTC CG JGAGTTCCTCAAITATTCCTCCGC       |
| IPF1_P750_F        | IPF1        | 4.12x10 <sup>-04</sup> | 3.09x10 <sup>-05</sup> | 4.3769 | 1.6090  | 0.3338 | CCTCGTGTATGGGAAGTACGTT CG JGGCTGGCCAAATGGGCC              |
| TUSC3_E29_R        | TUSC3       | 3.55x10 <sup>-02</sup> | 9.93x10 <sup>-03</sup> | 2.6310 | -3.7948 | 0.3269 | CAGTCTTCTCCCGTGAAC CG GATGCTCTGTICAGTCTCCCTCTCTGCGTC      |
| BCR_P346_F         | BCR         | 7.91x10 <sup>-03</sup> | 1.21x10 <sup>-03</sup> | 3.3372 | -1.8627 | 0.3167 | CTCTGACACGACGACTGGCAGTGC CG GTGACGCTTATGGCAGTCCGG         |
| ZP3_E90_F          | ZP3         | 3.48x10 <sup>-02</sup> | 9.61x10 <sup>-03</sup> | 2.6433 | -3.7645 | 0.3107 | CGCAGTGCACGTTGTCCAGCAGGATGTGC CG GTGCCATAGCCGAAAGAGCGGTT  |
| DNAJC15_P65_F      | DNAJC15     | 1.22x10 <sup>-05</sup> | 5.35x10 <sup>-07</sup> | 5.3799 | 5.5263  | 0.2996 | GTGGTAGAACTGTGGCATTAAACAGAAAGT CG JACAGAAAGTTGAGAGTGGGAAG |
| PALM2-AKAP2_P420_R | PALM2-AKAP2 | 4.29x10 <sup>-02</sup> | 1.31x10 <sup>-02</sup> | 2.5287 | -4.0424 | 0.2970 | GGGTCCCAACATTCGGTCAGA CG CCCCCTCTCCACTGGCAGTCTGCC         |
| PRKCDPB_E206_F     | PRKCDPB     | 2.85x10 <sup>-02</sup> | 7.16x10 <sup>-03</sup> | 2.7486 | -3.4997 | 0.2905 | GCCCAGGCCGCTCTGGATGGG CG JACAGGACCCCTGCCAGGCCCTCC         |
| MYOD1_E156_F       | MYOD1       | 2.94x10 <sup>-02</sup> | 7.41x10 <sup>-03</sup> | 2.7366 | -3.5304 | 0.2827 | TGGCGGAAGCCAGGACCGTGCCG CG JCCACCGCCAGGATATGGAGCTACTGTC   |

Table SI. Continued.

| ID               | Gene name | adj.P.Val              | P-value                | t      | B       | logFC  | Sequence                                                           |
|------------------|-----------|------------------------|------------------------|--------|---------|--------|--------------------------------------------------------------------|
| ICAI_P72_R       | ICAI      | 4.29x10 <sup>-02</sup> | 1.31x10 <sup>-02</sup> | 2.5290 | -4.0418 | 0.2791 | CTCCGGCAGGTGTTCACCGTGGCCATAG CG TTTGGTCAACAATGACCTGGCGG            |
| IGFBP1_P12_R     | IGFBP1    | 3.99x10 <sup>-02</sup> | 1.16x10 <sup>-02</sup> | 2.5733 | -3.9356 | 0.2723 | CCTCCACACAGGGTT G CG TAGGGCC TGGGTGCACTAGCAAACAAC                  |
| RARA_P176_R      | RARA      | 4.13x10 <sup>-02</sup> | 1.24x10 <sup>-02</sup> | 2.5486 | -3.9950 | 0.2686 | GAACTGTTCCTGTCCCCAGC CG ATGACCAAGCAGCCCATTTCTTC                    |
| WRN_P969_F       | WRN       | 2.53x10 <sup>-02</sup> | 6.11x10 <sup>-03</sup> | 2.8045 | -3.3557 | 0.2612 | TTTCAGGACACTGTGAGGATGCTCT CG GACCCCAACCGAGACTGGTGG                 |
| TERT_P360_R      | TERT      | 3.93x10 <sup>-02</sup> | 1.13x10 <sup>-02</sup> | 2.5828 | -3.9125 | 0.2570 | CGAGGGCCCAAGCGGAGAGAGT CG AATCGGCC TAGGCTAGGCTGTGGG                |
| RARRES1_P426_R   | RARRES1   | 2.39x10 <sup>-02</sup> | 5.60x10 <sup>-03</sup> | 2.8349 | -3.2763 | 0.2465 | CGGAGAAAAGGGCAGGCCAG CG GCGCAIT GATGGGGCTCCT                       |
| PGF_P320_F       | PGF       | 3.65x10 <sup>-02</sup> | 1.03x10 <sup>-02</sup> | 2.6173 | -3.8286 | 0.2408 | CCAGGAGTCCAGCGTCA CG JTC A AGGTC ATG ATCT AACCGCTCTGCG             |
| EFNB3_E17_R      | EFNB3     | 1.20x10 <sup>-06</sup> | 3.83x10 <sup>-08</sup> | 5.9849 | 8.0960  | 0.2397 | GACTGGTTTCCTCCCTAGCC CG JTGCCCTCAATCCAGCGGAGGC                     |
| RAN_P581_R       | RAN       | 4.26x10 <sup>-02</sup> | 1.29x10 <sup>-02</sup> | 2.5338 | -4.0304 | 0.2393 | GGTGCAATCCCTCTCTGGTTCT CG JCTCCA ACTGGGCCCTGGTCCCTGGGG             |
| HOXB2_P488_R     | HOXB2     | 1.15x10 <sup>-03</sup> | 1.10x10 <sup>-04</sup> | 4.0358 | 0.3959  | 0.2385 | AGGAAAAGATGAGT AGG ATCTCCG CG JTTGGAGGAAGAGGGAGTC                  |
| GDF10_E39_F      | GDF10     | 2.75x10 <sup>-08</sup> | 4.58x10 <sup>-10</sup> | 6.9503 | 12.4333 | 0.2316 | GACCTCTGGGGCTGCAGCTGACAGGGT CG JTCCTTGGCCCGGCTGCCGTGTGC<br>GTGC    |
| ELL_P693_F       | ELL       | 2.64x10 <sup>-02</sup> | 6.46x10 <sup>-03</sup> | 2.7852 | -3.4057 | 0.2305 | ATCCCCACAGTCCC TGAG CG ATGGTGCAGTCCAGCTTCATTTTCCTATT               |
| F2R_P839_F       | F2R       | 1.49x10 <sup>-02</sup> | 2.94x10 <sup>-03</sup> | 3.0530 | -2.6856 | 0.2278 | CCAGGTAATCCGAGGGTGGGG CG JA AGGGTGGCCTGAGCCAGG                     |
| PLSCR3_P751_R    | PLSCR3    | 2.31x10 <sup>-02</sup> | 5.32x10 <sup>-03</sup> | 2.8530 | -3.2285 | 0.2277 | GTGGAAGCTCGGATTTGGCCCA CG JAGCAGCGAGGATCCACCGAGACATTT              |
| BRCA1_P835_R     | BRCA1     | 3.41x10 <sup>-03</sup> | 4.26x10 <sup>-04</sup> | 3.6517 | -0.8857 | 0.2251 | GCAATGCCACCAAGTCAATGGGGTGT CG JTTTGGAGGGA CAAGTGGTAAGA             |
| SNCG_E119_F      | SNCG      | 6.35x10 <sup>-03</sup> | 9.47x10 <sup>-04</sup> | 3.4128 | -1.6344 | 0.2184 | GGAAAAGACCAAGCAGGGGGTGA CG JG AAGCAGCTGAGAGACCAAGGAG               |
| CD40_P372_R      | CD40      | 3.48x10 <sup>-02</sup> | 9.60x10 <sup>-03</sup> | 2.6435 | -3.7640 | 0.2136 | GGAACTTCCTCAGCCCTCT CG JCA GTGGAGCCCTTTTCGGTTCTGCCAGG              |
| SOX17_P303_F     | SOX17     | 3.45x10 <sup>-02</sup> | 9.47x10 <sup>-03</sup> | 2.6484 | -3.7518 | 0.2125 | GAATGGACGTCGGTATGTTCA TCTAA CG JACCTTGGGCAAGTACGTGATTTC            |
| FLT4_E206_F      | FLT4      | 1.63x10 <sup>-02</sup> | 3.43x10 <sup>-03</sup> | 3.0019 | -2.8273 | 0.2110 | CGTGTCCCTCAGCGGT CG JCGCACCAGGGCCACCCTGTGCC                        |
| SLC6A8_P193_R    | SLC6A8    | 1.45x10 <sup>-04</sup> | 8.85x10 <sup>-06</sup> | 4.6984 | 2.8111  | 0.2082 | GTAGCAACCAATCC TGCCCTCC CG JTTGGAGCGGGCTCTCCCTCCCCCG               |
| RAD50_P191_F     | RAD50     | 2.80x10 <sup>-02</sup> | 6.95x10 <sup>-03</sup> | 2.7595 | -3.4718 | 0.2069 | GAGTCCAGGATCAAGCTTTGGGAAG CG JCCATCCGTCACAGGCTTGGTCTCC             |
| LIMK1_P709_R     | LIMK1     | 2.16x10 <sup>-02</sup> | 4.88x10 <sup>-03</sup> | 2.8828 | -3.1496 | 0.2040 | ACCACCAATTCCTTTGGAI CG JCTTGACTCAGCCCAAAACCCTGTCT                  |
| ERN1_P809_R      | ERN1      | 2.03x10 <sup>-02</sup> | 4.44x10 <sup>-03</sup> | 2.9151 | -3.0633 | 0.1978 | GGATGTGAAGTTTGAAGATGGTCT CG JTC CAGCTCGAGTGCATTTTCATTTGCTTTT       |
| FGF9_P862_R      | FGF9      | 3.51x10 <sup>-08</sup> | 6.28x10 <sup>-10</sup> | 6.8828 | 12.1226 | 0.1640 | GACTCAGGGTTTCTTCCCTCC CG JCTGGGTCCCTGACCAGCAATTCACGCAATTT          |
| MAPK10_E26_F     | MAPK10    | 2.98x10 <sup>-02</sup> | 7.66x10 <sup>-03</sup> | 2.7251 | -3.5597 | 0.1606 | AGCGGCAAAATCCCTCTGGGCT CG JCTGGGTCCCTGACCAGCCCAATTT                |
| GNAS_E58_F       | GNAS      | 2.34x10 <sup>-02</sup> | 5.44x10 <sup>-03</sup> | 2.8453 | -3.2489 | 0.1561 | GAGGACCGCGGAGGCACCTCTCT CG JAGTCTTAGGCTGCGGAATCTAAGA               |
| AATK_P519_R      | AATK      | 3.51x10 <sup>-08</sup> | 6.30x10 <sup>-10</sup> | 6.8820 | 12.1186 | 0.1446 | GGGACGTCGCCAGTGGTCTCT CG JAAAGAACGACGAGCAAGAGCGCGG                 |
| p16_seq_47_S85_F | CDKN2A    | 3.58x10 <sup>-02</sup> | 1.00x10 <sup>-02</sup> | 2.6277 | -3.8030 | 0.1333 | CGAAGGCTCCATGTCTGCTCC CG JCCGCGGCTCCATGTCTCCCC                     |
| SOD3_P460_R      | SOD3      | 6.64x10 <sup>-03</sup> | 1.00x10 <sup>-03</sup> | 3.3957 | -1.6864 | 0.1311 | TAGCACAAAGTCTTAGAATACCAGAA CG JGAGACGTGCTTTTCTTGGACCTTAAACG<br>AAA |
| NGFB_P13_F       | NGFB      | 4.94x10 <sup>-02</sup> | 1.55x10 <sup>-02</sup> | 2.4650 | -4.1924 | 0.1295 | CCAGCGCTCTGTGTGTCGGGAG CG JCCAGCTGTCTCACACAGGCTTCTTGA              |
| WNT1_P79_R       | WNT1      | 1.54x10 <sup>-02</sup> | 3.14x10 <sup>-03</sup> | 3.0307 | -2.7476 | 0.1250 | CCATGTCTGGCCCTTAAAC CG JGTGGCCCTTGGTGCCACAGTGGCGGC                 |
| THY1_P20_R       | THY1      | 1.22x10 <sup>-04</sup> | 6.98x10 <sup>-06</sup> | 4.7582 | 3.0406  | 0.1150 | CCGGTTGTGCACCCAGCTCGGAGCC CG JAGTCTTACACCGGGGATGGAG                |
| IRF5_E101_F      | IRF5      | 2.83x10 <sup>-03</sup> | 3.25x10 <sup>-04</sup> | 3.7307 | -0.6299 | 0.1106 | TGCTCCCTGGCGCAGCCACGACGGCGCAC CG JACAGACAGGTGGGTCCCGGCC            |
| BAX_E281_R       | BAX       | 4.07x10 <sup>-02</sup> | 1.21x10 <sup>-02</sup> | 2.5590 | -3.9699 | 0.1028 | AGGTTCTTGGCTCTCTGATCC CG JGTCCCGATCCCTGCCCTCTCTGCG                 |
| IGF2R_P396_R     | IGF2R     | 3.40x10 <sup>-04</sup> | 2.44x10 <sup>-05</sup> | 4.4392 | 1.8376  | 0.0898 | CACGGATCCGCTGCCACTAGGCTGT CG JAAGGCAATTAACCTCCCTGGCACCTTTGAT       |
| CREBBP_P712_R    | CREBBP    | 5.47x10 <sup>-06</sup> | 2.11x10 <sup>-07</sup> | 5.5968 | 6.4323  | 0.0582 | AGTGAGGGGGCCCTCAGCCCTGT CG JATCCCCAAGGGCGGACAGGCAGACACC            |

Table S1. Continued.

| ID             | Gene name | adj.P.Val              | P-value                | t      | B       | logFC  | Sequence                                                         |
|----------------|-----------|------------------------|------------------------|--------|---------|--------|------------------------------------------------------------------|
| APC_E117_R     | APC       | 4.02x10 <sup>-03</sup> | 5.26x10 <sup>-04</sup> | 3.5898 | -1.0835 | 0.0542 | TTTCCCTCGCACTGTCTTAAAC CG ATGGCCCTTCTCTTGGCACAGGGTCC             |
| IL11_E232_F    | IL11      | 7.62x10 <sup>-04</sup> | 6.53x10 <sup>-05</sup> | 4.1783 | 0.8944  | 0.0490 | CCTGTCTCCGGTCCCTCTCTGTG CG ACTCAGCGGGGTCTGCTCCACC                |
| CDKN2B_E220_F  | CDKN2B    | 1.54x10 <sup>-02</sup> | 3.13x10 <sup>-03</sup> | 3.0323 | -2.7432 | 0.0467 | CTCAGCTTCAITACCTCC CG TCGTCTTCTGCGGTGGGGCCCC                     |
| MSH2_P1008_F   | MSH2      | 1.32x10 <sup>-02</sup> | 2.41x10 <sup>-03</sup> | 3.1176 | -2.5039 | 0.0456 | ACTGGGATTATGGGTGTGACACCA CG CCTGGCGTCAAACGTTTGTCTT               |
| ALK_E183_R     | ALK       | 2.54x10 <sup>-07</sup> | 5.97x10 <sup>-09</sup> | 6.3962 | 9.9135  | 0.0423 | TTCCGACGCATCGAGCGGGCCCCGG CG GCACGACGTGAGGGCGTTCAGG              |
| FABP3_P598_F   | FABP3     | 1.48x10 <sup>-02</sup> | 2.89x10 <sup>-03</sup> | 3.0591 | -2.6687 | 0.0418 | CCCTTCACTCTCAGTCCCTGGTGG CG GACAGACGTACCAGCGCTCGGTCT             |
| LAMC1_P808_F   | LAMC1     | 2.52x10 <sup>-04</sup> | 1.69x10 <sup>-05</sup> | 4.5337 | 2.1883  | 0.0349 | ACACAGTGAAGAATTTCGCAGTGGG CG TGGTACCCCAAGGAAAATTCAT              |
| CDH11_P354_R   | CDH11     | 1.36x10 <sup>-02</sup> | 2.57x10 <sup>-03</sup> | 3.0965 | -2.5635 | 0.0342 | TCAGGGTCCAGATGGAGTCTGGAG CG ACTGAAATTTGGGCTCCAGGG                |
| JUNB_P1149_R   | JUNB      | 1.01x10 <sup>-02</sup> | 1.69x10 <sup>-03</sup> | 3.2317 | -2.1752 | 0.0342 | GGCTGTTGCCACACTTCTGCTG CG CTTTCGCCAGCCTGTTTCTAAGG                |
| LRP2_E20_F     | LRP2      | 4.71x10 <sup>-02</sup> | 1.45x10 <sup>-02</sup> | 2.4893 | -4.1356 | 0.0307 | GCACCCGACGGCCTCTGTAG CG JACGCTCCTTATAGTCTGCACCTCCG               |
| PLAU_P11_F     | PLAU      | 8.67x10 <sup>-11</sup> | 9.79x10 <sup>-13</sup> | 8.2322 | 18.4847 | 0.0291 | GCGGGCCTGATATAGACAGGCCCG CG GGTCGCAGCACAGTGGGAGACC               |
| CHFR_P635_R    | CHFR      | 3.01x10 <sup>-03</sup> | 3.54x10 <sup>-04</sup> | 3.7062 | -0.7098 | 0.0291 | GAAGAGGAGTAAAGACGGCGAGAC CG TCCACGACAGGGGAGTCTGT                 |
| APBA1_P644_F   | APBA1     | 8.65x10 <sup>-04</sup> | 7.88x10 <sup>-05</sup> | 4.1273 | 0.7147  | 0.0290 | GAGTGACTCCCGAGCTTCC CG CTTCCAGGCCCTTAGATATCG                     |
| IGSF4C_E65_F   | IGSF4C    | 1.24x10 <sup>-02</sup> | 2.23x10 <sup>-03</sup> | 3.1429 | -2.4316 | 0.0284 | CAGCAGCAGCGGCCACTGGAA CG CCGGGCCCGGCCCATGGTGCCG                  |
| CDKN1C_P6_R    | CDKN1C    | 2.01x10 <sup>-06</sup> | 6.96x10 <sup>-08</sup> | 5.8504 | 7.5134  | 0.0261 | TCGCTCAGGCCCTGGCCGCA CG AGCAGCGCACCTTGGCCTGTGGA                  |
| ENC1_P484_R    | ENC1      | 1.54x10 <sup>-02</sup> | 3.12x10 <sup>-03</sup> | 3.0336 | -2.7397 | 0.0255 | ATGCTCTAAAAGGGCTGCAAGGG CG AGCTGGGTATCCGCAGGACAGG                |
| CDK6_E256_F    | CDK6      | 3.29x10 <sup>-03</sup> | 3.98x10 <sup>-04</sup> | 3.6718 | -0.8210 | 0.0254 | CGAAGTCTCAACAACAGACA CG ATATACATAGCTCTGCCCAAGCGCT                |
| AKT1_P310_R    | AKT1      | 1.09x10 <sup>-05</sup> | 4.71x10 <sup>-07</sup> | 5.4099 | 5.6504  | 0.0254 | TGCCGTGACCCCTAGCAGAAAGGGCC CG JAGACAGGTGAGGACGAATCCC             |
| ITGB1_P451_F   | ITGB1     | 3.84x10 <sup>-05</sup> | 1.89x10 <sup>-06</sup> | 5.0797 | 4.3044  | 0.0239 | CGTTTGTCCACTGATGTC CG AGCCCGGAGATCTGCATCTCGG                     |
| BCL2L2_P280_F  | BCL2L2    | 1.38x10 <sup>-02</sup> | 2.62x10 <sup>-03</sup> | 3.0910 | -2.5790 | 0.0223 | CTGGAAGATTCAACAAGTGCATGGAACAT CG GAAACCTCTTGAAAATGCTA<br>AATT    |
| FHIT_P93_R     | FHIT      | 1.77x10 <sup>-04</sup> | 1.11x10 <sup>-05</sup> | 4.6401 | 2.5890  | 0.0216 | GGAGCGGAGGCCAATAAGCGGCAGAGCATG CG CCTACGCCGGGCCAATTGAAAGC        |
| STK11_P295_R   | STK11     | 9.88x10 <sup>-03</sup> | 1.64x10 <sup>-03</sup> | 3.2413 | -2.1472 | 0.0215 | CGAGGTACACAGCCGTGGCT CG TCTCCCATGCCTGTCTCCCG                     |
| FGF12_P210_R   | FGF12     | 1.05x10 <sup>-05</sup> | 4.48x10 <sup>-07</sup> | 5.4215 | 5.6985  | 0.0210 | AAACTAGAAAATGGATTGGACTAGTACTG CG TGCATCAGGACGAAATTACTGAAG<br>TCT |
| CCND3_P435_F   | CCND3     | 2.22x10 <sup>-03</sup> | 2.44x10 <sup>-04</sup> | 3.8130 | -0.3588 | 0.0209 | ACTCACTACATCTTCAAGAAA CG GAAACCGAGGCAACTGTTCATTCAGTTGG           |
| HHIP_E94_F     | HHIP      | 1.65x10 <sup>-03</sup> | 1.67x10 <sup>-04</sup> | 3.9207 | 0.0022  | 0.0206 | GGGGCGCGCTGTGGCAGCACCTCCC CG CGCGCTAGTTAAAAGAAGAAGAAAAG          |
| IDI_P880_F     | IDI       | 6.89x10 <sup>-04</sup> | 5.64x10 <sup>-05</sup> | 4.2178 | 1.0347  | 0.0203 | CTAACGGTCTGAGCCGCTGGTTCAGA CG CTGACACAGACCGGCCCGGGA              |
| SMARCA3_P109_R | SMARCA3   | 4.70x10 <sup>-04</sup> | 3.65x10 <sup>-05</sup> | 4.3333 | 1.4502  | 0.0200 | AGCACAGAAAGGAGGGCAACTCCGCC CG CTGCCAATCAAAGACGGCGGG              |
| KRAS_P651_F    | KRAS      | 9.14x10 <sup>-03</sup> | 1.49x10 <sup>-03</sup> | 3.2710 | -2.0596 | 0.0196 | CACACCGGGGTGTGTGATCG CG CCCCGATTATATCAGCCTCAGCAC                 |
| LAMB1_E144_R   | LAMB1     | 3.83x10 <sup>-02</sup> | 1.10x10 <sup>-02</sup> | 2.5947 | -3.8837 | 0.0190 | GAACAGAGGAGGGCCCTCTGCTCATG CG CAACGAGGAGAGCCGGGGCTG              |
| ETV1_P515_F    | ETV1      | 3.34x10 <sup>-03</sup> | 4.09x10 <sup>-04</sup> | 3.6641 | -0.8460 | 0.0189 | CACCTCCCTTGGAAAGC CG AAAAGCGCCTTGACAGAGCTCAATTCG                 |
| IFNGR2_E164_F  | IFNGR2    | 1.64x10 <sup>-02</sup> | 3.47x10 <sup>-03</sup> | 2.9975 | -2.8394 | 0.0179 | ACATTTGACTAAAGGGGCGAATCCT CG AATGTGCGATCAAGCACCCGAGAG            |
| VAV2_E58_F     | VAV2      | 7.97x10 <sup>-05</sup> | 4.15x10 <sup>-06</sup> | 4.8869 | 3.5409  | 0.0178 | CACACCCCGGTGGTGGG CG JGACAGGACCTTGCAATCGATGAGCCAG                |
| E2F3_P840_R    | E2F3      | 1.23x10 <sup>-04</sup> | 7.37x10 <sup>-06</sup> | 4.7445 | 2.9881  | 0.0171 | CTTTTGCACCTGCCAGACAT CG TCCGCATGGTCCAACTTGCCTTTGGCA              |
| PCGF4_P760_R   | PCGF4     | 2.90x10 <sup>-03</sup> | 3.35x10 <sup>-04</sup> | 3.7216 | -0.6595 | 0.0168 | GAACGATGCGATCTCCTGGT CG JGACAGACCCCTGCTTCGGGGCTCCG               |
| BCL3_E71_F     | BCL3      | 3.17x10 <sup>-02</sup> | 8.43x10 <sup>-03</sup> | 2.6903 | -3.6473 | 0.0168 | GGGGCCCGTGGACCTGCGCAC CG GCCCAAGGCCCGCGGACTCC                    |
| FAT_P279_R     | FAT       | 3.16x10 <sup>-02</sup> | 8.37x10 <sup>-03</sup> | 2.6933 | -3.6398 | 0.0164 | AGGCTTGTGATGCCGAGGTTAGTTA CG JGCCAGCCACAGGGCGTGTGCAAGGA          |

Table SI. Continued.

| ID             | Gene name | adj.P.Val              | P-value                | t      | B       | logFC  | Sequence                                                        |
|----------------|-----------|------------------------|------------------------|--------|---------|--------|-----------------------------------------------------------------|
| CPNE1_P138_F   | CPNE1     | 1.53x10 <sup>-05</sup> | 6.93x10 <sup>-07</sup> | 5.3191 | 5.2755  | 0.0162 | ATTCAAGTCCCTGCTTGGGACTGTTGGJCGJACAGGACCGACCTTGGGCTAGTGCC        |
| TUBB3_P364_F   | TUBB3     | 6.89x10 <sup>-04</sup> | 5.63x10 <sup>-05</sup> | 4.2182 | 1.0362  | 0.0161 | GGCGTGGGAAAAAGACCCCTCJGJTACAAAAGCCGCAAGGTGGGGC                  |
| WNT2B_P1195_F  | WNT2B     | 5.97x10 <sup>-08</sup> | 1.15x10 <sup>-09</sup> | 6.7531 | 11.5278 | 0.0161 | CTAGATTGGAAGCCATGTTGTTCTGAJCGJCCAAAGGCCGGCTGCAACGTGCC           |
| CD34_E20_R     | CD34      | 8.65x10 <sup>-04</sup> | 7.93x10 <sup>-05</sup> | 4.1257 | 0.7090  | 0.0156 | TTAGGAGGAGGCTGGTGGTGGJCGJCCGTCGAGGCCAAAAGGTTG                   |
| PDGFA_P78_F    | PDGFA     | 2.06x10 <sup>-02</sup> | 4.58x10 <sup>-03</sup> | 2.9041 | -3.0929 | 0.0156 | CACCTGCCTGGACCGCTGGCCJCGJCCCGCCGGCTGGAGCTGGAGCC                 |
| JAK2_P772_R    | JAK2      | 2.23x10 <sup>-05</sup> | 1.05x10 <sup>-06</sup> | 5.2204 | 4.8722  | 0.0154 | TCGTAGGCCCTTGTGCCAACCJCGJAGGGGGCTGGCGCTTCATCCCAC                |
| COL6A1_P425_F  | COL6A1    | 1.87x10 <sup>-04</sup> | 1.21x10 <sup>-05</sup> | 4.6201 | 2.5135  | 0.0151 | GAAGAGGGAGTGAAGCTGCCCTGCGJGJCCCGCATGGAGACGCTCTGGA               |
| MLH1_P381_F    | MLH1      | 1.50x10 <sup>-04</sup> | 9.36x10 <sup>-06</sup> | 4.6843 | 2.7575  | 0.0151 | GGGGAGGCCACAAGACGACAGGGCCAJCGJTTAGAAAGGCCCAAGGGGAG              |
| INHA_P1189_F   | INHA      | 4.07x10 <sup>-07</sup> | 1.08x10 <sup>-08</sup> | 6.2659 | 9.3320  | 0.0150 | GGTACAGCAGAGCCCGTGTCTCCGGCJCGJCCGCCGGGAAGCTCAGGC                |
| DST_P262_R     | DST       | 1.34x10 <sup>-07</sup> | 2.84x10 <sup>-09</sup> | 6.5582 | 10.6422 | 0.0146 | GGACCGTCCGGCCAAAGCACGCCCAACCCJCGJGACACTGGCTGCCCGTCCC            |
| PKD2_P336_R    | PKD2      | 1.47x10 <sup>-03</sup> | 1.45x10 <sup>-04</sup> | 3.9595 | 0.1339  | 0.0143 | ACCAAGAGTTATCTCAGCGTJCGJGGCAGGCATCGACAGCTCCAGGAG                |
| CDK10_E74_F    | CDK10     | 8.13x10 <sup>-04</sup> | 7.24x10 <sup>-05</sup> | 4.1504 | 0.7958  | 0.0137 | GGAGCCAGATCTGGAGTCCGAGCAGATCJGJCTGAAAGTGTATTCGTAAGGAGG          |
| MATK_P64_F     | MATK      | 2.52x10 <sup>-02</sup> | 6.02x10 <sup>-03</sup> | 2.8099 | -3.3417 | 0.0135 | GGCCGACTTAACCTCTTTGTTCAGCJCGJGGCTGGTTCACCCACCTGGTGGCAG          |
| DAB2IP_P9_F    | DAB2IP    | 8.43x10 <sup>-03</sup> | 1.33x10 <sup>-03</sup> | 3.3083 | -1.9492 | 0.0127 | CTCAGCCCGCCCTCAAGGGCTCCATCAAGJCGJACCAAGAGCCAGCCCAAGCTGG<br>ACCG |
| BMPR1A_P956_F  | BMPR1A    | 1.85x10 <sup>-04</sup> | 1.18x10 <sup>-05</sup> | 4.6261 | 2.5363  | 0.0122 | TTTCCAATGGACGGAAATGAGCCTCJGJGAGGGTACACGAGGTACCAGGCT             |
| COL4A3_P545_F  | COL4A3    | 3.77x10 <sup>-03</sup> | 4.84x10 <sup>-04</sup> | 3.6146 | -1.0044 | 0.0121 | GGCGCCTTACCTGTGGGAGCCJCGJACGCCAGGAGCTGCCGCCTTG                  |
| EIF2AK2_E103_R | EIF2AK2   | 9.35x10 <sup>-05</sup> | 4.97x10 <sup>-06</sup> | 4.8426 | 3.3679  | 0.0120 | GGACGCAGGATGGCAGTCCJCGJCCCGGCTGGGCCTGCAGCC                      |
| IGF1R_P325_R   | IGF1R     | 4.44x10 <sup>-04</sup> | 3.39x10 <sup>-05</sup> | 4.3524 | 1.5197  | 0.0119 | CAGGCCGGGCTTGTTTTCTCJCGJCTAGGCAGATTTGGGCTTTGCCCCCT              |
| WNT5A_E43_F    | WNT5A     | 2.56x10 <sup>-03</sup> | 2.87x10 <sup>-04</sup> | 3.7662 | -0.5135 | 0.0117 | CAAGGCAGGGCTGTCTGGGGJCGJCAACTAGGGAGCCCGCGGTCCGGC                |
| CASP3_P420_R   | CASP3     | 2.70x10 <sup>-02</sup> | 6.66x10 <sup>-03</sup> | 2.7742 | -3.4341 | 0.0117 | CTCTGGGAAAGAGAGGACAGGCJCGJGGACGCCCAACCCGTAATTTCTG               |
| IGSF4_P454_F   | IGSF4     | 1.23x10 <sup>-04</sup> | 7.29x10 <sup>-06</sup> | 4.7470 | 2.9978  | 0.0116 | GCACACCGAGTGCATCTGGCTAGJCGJACACAGAGCTTGCAAATTTCCGTCA            |
| ERCC1_P354_F   | ERCC1     | 3.77x10 <sup>-03</sup> | 4.82x10 <sup>-04</sup> | 3.6157 | -1.0009 | 0.0115 | TCCTCTTCCCGGTCTGTGJCGJAGTCCGTGTGTGACACAGCAGTGACCCA              |
| CCKBR_P480_F   | CCKBR     | 1.18x10 <sup>-02</sup> | 2.08x10 <sup>-03</sup> | 3.1656 | -2.3668 | 0.0110 | CGCAGCGAGGAGTGCAGGGAACJGJGJTAGCAATAGTGCACGGTCACTGGGG            |
| MXI1_P75_R     | MXI1      | 5.21x10 <sup>-03</sup> | 7.38x10 <sup>-04</sup> | 3.4887 | -1.4006 | 0.0109 | CCACCTTTTATTTTGA CCGGTCTCGJATGGCGACAGGCTCGCACTAGGACCC           |
| MALT1_P406_R   | MALT1     | 1.86x10 <sup>-02</sup> | 4.03x10 <sup>-03</sup> | 2.9474 | -2.9763 | 0.0106 | TGCCATACACATCTAACCTAAAACJGJAGGAAAGCTCCGCTGAGGTTGCCCCAC          |
| MAPK12_E165_R  | MAPK12    | 2.67x10 <sup>-02</sup> | 6.57x10 <sup>-03</sup> | 2.7791 | -3.4214 | 0.0101 | CGGTAAAAGCCACTGCGGGGGGJCGJCGGAGAGCTCATGGCAGGCC                  |
| TKI_P62_R      | TKI       | 1.54x10 <sup>-02</sup> | 3.13x10 <sup>-03</sup> | 3.0321 | -2.7440 | 0.0101 | CGTGTGGCCAATCACGAGCCGGCCJCGJCCGCCATGGGGCCAATCAGCGGCC            |
| IGFBP6_P328_R  | IGFBP6    | 2.65x10 <sup>-02</sup> | 6.50x10 <sup>-03</sup> | 2.7829 | -3.4117 | 0.0099 | CGGGTCCCTGCATGCCCTCJCGJTCGTCTACACAFACACATAAGTGGATT              |
| LIF_E208_F     | LIF       | 2.22x10 <sup>-03</sup> | 2.45x10 <sup>-04</sup> | 3.8115 | -0.3640 | 0.0098 | CCCAAGCCCTCCGGTGGCTGGA AAGGCJCGJCGGGCCGCCCAAGTGTTCGTGTCTGCG     |
| TJPI_P326_R    | TJPI      | 3.48x10 <sup>-03</sup> | 4.37x10 <sup>-04</sup> | 3.6445 | -0.9090 | 0.0098 | CATGCATGAGTGGCTGGA AAGGCJCGJGACAGCCGATAACCCGACAGTTGTTT          |
| LMO1_P169_F    | LMO1      | 2.67x10 <sup>-04</sup> | 1.81x10 <sup>-05</sup> | 4.5167 | 2.1249  | 0.0091 | CCTAGCTCGGTGAGCGTCTTTTGTCTCJGJATCCCAAGGTCGTGTCTTCAATGATT        |
| KLF5_P13_F     | KLF5      | 4.06x10 <sup>-02</sup> | 1.20x10 <sup>-02</sup> | 2.5608 | -3.9656 | 0.0091 | AGTTGGGTGAAATAGAGCGGGJCGJCAAGTGTCAAGTGTCAAGTGTCCGGGGC           |
| DUSP4_E61_F    | DUSP4     | 2.36x10 <sup>-02</sup> | 5.52x10 <sup>-03</sup> | 2.8399 | -3.2631 | 0.0090 | CCTCCCGTGTATTTTGGCCGTJCGJCGGGCTCTGTTCGCCACTGGCGCC               |
| PTEN_P438_F    | PTEN      | 1.90x10 <sup>-02</sup> | 4.13x10 <sup>-03</sup> | 2.9390 | -2.9989 | 0.0090 | AAAGGAAAAGCGAATGCAGTCCACGCCJCGJGAAATCTAGGGGTAGAGGCAAG           |
| TMEFF1_E180_R  | TMEFF1    | 8.63x10 <sup>-03</sup> | 1.38x10 <sup>-03</sup> | 3.2956 | -1.9870 | 0.0090 | CTCCGCTCGCCTTCTGTCTGTACAJCGJTCGGTGTCTTCTGTCTTCCGCTTCTCTCT       |
| HLF_E192_F     | HLF       | 1.25x10 <sup>-02</sup> | 2.27x10 <sup>-03</sup> | 3.1378 | -2.4463 | 0.0089 | TGAACATTTTGCAA AACGAGGGGTJCGJAGGCAGGTGAGAGCATCTCTGCACGT         |

Table S1. Continued.

| ID                  | Gene name | adj.P.Val              | P-value                | t       | B       | logFC   | Sequence                                                           |
|---------------------|-----------|------------------------|------------------------|---------|---------|---------|--------------------------------------------------------------------|
| LIG4_P194_F         | LIG4      | 3.57x10 <sup>-03</sup> | 4.50x10 <sup>-04</sup> | 3.6357  | -0.9371 | 0.0089  | GAGTACACACGGGCTCCTATTGGCCCTCGJGACAGCAGATGCTCTCTGCAAGCAGTTG<br>ATC  |
| MCM6_E136_F         | MCM6      | 2.36x10 <sup>-02</sup> | 5.51x10 <sup>-03</sup> | 2.8408  | -3.2607 | 0.0087  | TCTGGCATTCTCGGCCACCCTCGJTCGGGGACCCTCCAGGTGCTGGCTGCCG               |
| HDAC11_P556_F       | HDAC11    | 2.71x10 <sup>-02</sup> | 6.71x10 <sup>-03</sup> | 2.7718  | -3.4404 | 0.0087  | GTCTTCGGCCGGAGTGTGTCCJCGJGAGCTGCTCGCAGACTGGGC                      |
| ABCA1_E120_R        | ABCA1     | 2.31x10 <sup>-02</sup> | 5.32x10 <sup>-03</sup> | 2.8525  | -3.2301 | 0.0087  | ACGGGGAAAAACAAGGAGCAAAGJCGJCCCTGAGAACCGGCTCTGTTG                   |
| APP_E8_F            | APP       | 2.28x10 <sup>-02</sup> | 5.23x10 <sup>-03</sup> | 2.8585  | -3.2142 | 0.0087  | GCGCGGGGCTCAGAGCCAGGJCGJAGTCAGCTGATCCGGCCCAACC                     |
| GSTP1_seq_38_S153_R | GSTP1     | 1.33x10 <sup>-02</sup> | 2.49x10 <sup>-03</sup> | 3.1073  | -2.5331 | 0.0084  | CCGTGACTCAGCACTGGGGCCGAGJCGJGGCGGGGACCCACCTTATAAGGCTCG             |
| EPM2A_P64_R         | EPM2A     | 6.61x10 <sup>-03</sup> | 9.93x10 <sup>-04</sup> | 3.3981  | -1.6790 | 0.0084  | TCATAAGGAAGGGAATGACCTCTAGACAGCJCGJCTTCTAATTTGTGAAACGGGG            |
| CSTB_E410_F         | CSTB      | 8.34x10 <sup>-03</sup> | 1.31x10 <sup>-03</sup> | 3.3128  | -1.9359 | 0.0079  | CCGGGTATCAATTCCCACTJCGJCCCTGTGCTGTATTGAGGGAGCCCAA                  |
| RASA1_E107_F        | RASA1     | 2.03x10 <sup>-02</sup> | 4.46x10 <sup>-03</sup> | 2.9131  | -3.0688 | 0.0078  | GCGGCAGGTAGGGCAGATAGJCGJGGCTTCAACATGATGGCGCC                       |
| TIMP2_E394_R        | TIMP2     | 9.00x10 <sup>-03</sup> | 1.45x10 <sup>-03</sup> | 3.2799  | -2.0335 | 0.0072  | TGCAAAACGCTGTGTGGGTGCAJCGJGGGAGCAGCTGCAGGGCTCG                     |
| ASCL1_E24_F         | ASCL1     | 2.06x10 <sup>-02</sup> | 4.61x10 <sup>-03</sup> | 2.9022  | -3.0980 | 0.0072  | TCTGGCCAGGGAACGTGGAAGGJCGJCAACCCACAGGGATCCGGCCAGG                  |
| NQO1_E74_R          | NQO1      | 2.58x10 <sup>-02</sup> | 6.23x10 <sup>-03</sup> | 2.7977  | -3.3732 | 0.0069  | CGGCTGCAACCTTGTGGGAGTGCJCGJGTGTGTGACCGTGCATTCTCT                   |
| UNG_P170_F          | UNG       | 3.16x10 <sup>-02</sup> | 8.35x10 <sup>-03</sup> | 2.6939  | -3.6383 | 0.0067  | AGCAGAGGTGGGTGAGGACAAAGJCGJATGAAAGAATAGGCCCCCGG                    |
| PAX6_E129_F         | PAX6      | 1.52x10 <sup>-02</sup> | 3.03x10 <sup>-03</sup> | 3.0428  | -2.7142 | 0.0067  | CGTCTCACTGGCCATTAGJCGJAGCTGACCTGTGCAATCCTCC                        |
| PCDH1_E22_F         | PCDH1     | 4.47x10 <sup>-03</sup> | 6.15x10 <sup>-04</sup> | 3.5434  | -1.2298 | 0.0066  | GCTCCGGCTCCGGCTGGCTGGGJCGJAGCAGCCCGGGGCTTTGGCTCC                   |
| TNC_P57_F           | TNC       | 4.80x10 <sup>-02</sup> | 1.49x10 <sup>-02</sup> | 2.4799  | -4.1576 | 0.0065  | TCCTTCTCTGTATGGGACGCCCTJCGJCTCCAGACATCCTTTCCCAAC                   |
| PTK2B_P673_R        | PTK2B     | 4.01x10 <sup>-02</sup> | 1.18x10 <sup>-02</sup> | 2.5684  | -3.9473 | 0.0063  | AAATCGCTGCTTTACCCGAAAGTJCGJTGCGCAGTGTCTTACCCGGCTGCAC               |
| ERBB2_P59_R         | ERBB2     | 1.18x10 <sup>-02</sup> | 2.10x10 <sup>-03</sup> | 3.1631  | -2.3738 | 0.0063  | AGTTCACACTCCGGAGTAACJCGJGAAAGTTCCTGTGTCTTTATTCTACTCTCC             |
| PTPRO_E56_F         | PTPRO     | 1.06x10 <sup>-02</sup> | 1.78x10 <sup>-03</sup> | 3.2159  | -2.2213 | 0.0059  | GGGACTGGAAGGCAGCATGGCTJCGJCCAGGAGCAACCTCGGGCCCAAGG                 |
| EPHB2_E297_F        | EPHB2     | 3.77x10 <sup>-02</sup> | 1.07x10 <sup>-02</sup> | 2.6030  | -3.8636 | 0.0055  | GCTGATTGACTGTGCCAGGAGGAGJCGJAGGGACCATCTTGCCGAGGC                   |
| PTCH_E42_F          | PTCH      | 3.39x10 <sup>-02</sup> | 9.22x10 <sup>-03</sup> | 2.6580  | -3.7280 | 0.0055  | GCAGGCTGCTCGGGCTCGGCTCJCGJTTGACAGACCAGCCGCTGCTGTGCTCA              |
| GAS1_P754_R         | GAS1      | 3.98x10 <sup>-02</sup> | 1.15x10 <sup>-02</sup> | 2.5766  | -3.9277 | 0.0054  | AAGGAGGCTCGGATATGCAACCCAGCTJCGJCGCACAGAAACCAGGGGCAGGGCT            |
| PTPNS1_P301_R       | PTPNS1    | 3.28x10 <sup>-02</sup> | 8.80x10 <sup>-03</sup> | 2.6752  | -3.6852 | 0.0053  | GGCTTGGGCAGCCCGGJCGJGCGCTTCCAGTGCCTTCCAGGC                         |
| VEGFB_P658_F        | VEGFB     | 1.84x10 <sup>-02</sup> | 3.94x10 <sup>-03</sup> | -2.9549 | -2.9558 | -0.0117 | CGGCTAGGGCAGCGGCAGCCGCCACCATCJCGJAGCCAAACCCAAAGGCCCGGAGAT<br>CGT   |
| GNP7_E310_R         | GNP7      | 2.43x10 <sup>-02</sup> | 5.76x10 <sup>-03</sup> | -2.8255 | -3.3008 | -0.0138 | AGGCCAGACGGCTGAGAGAGAAACAACACTJCGJTAATCCCCACGTATTGTGGAGTCCA<br>AAA |
| IGFBP5_P9_R         | IGFBP5    | 8.04x10 <sup>-03</sup> | 1.24x10 <sup>-03</sup> | -3.3283 | -1.8896 | -0.0161 | GAAGTTTCCAAAGAGACTACGGGGCTCJCGJGAGAGCAGGGCCTTTTAATATAGC            |
| CTAG1B_P77_F        | CTAG1B    | 2.53x10 <sup>-02</sup> | 6.06x10 <sup>-03</sup> | -2.8075 | -3.3479 | -0.0179 | CCGGATCTCAGGGCCCTGJCGJACAGGGGCCCTACTTCCGGCCC                       |
| XRCC2_P1077_F       | XRCC2     | 8.13x10 <sup>-04</sup> | 7.18x10 <sup>-05</sup> | -4.1526 | 0.8035  | -0.0205 | CCTTGGCCTCTTCTACGTAGGGCTGJCGJGGCCGTATCTGAAACATTAACAACA             |
| UGT1A7_P751_R       | UGT1A7    | 7.94x10 <sup>-03</sup> | 1.22x10 <sup>-03</sup> | -3.3351 | -1.8693 | -0.0216 | CGCTAAGACCCTTGCTCTTTCJCGJTCGAACATGAGATGCCAATTTCTTCTGGG             |
| THPO_P585_R         | THPO      | 1.48x10 <sup>-02</sup> | 2.91x10 <sup>-03</sup> | -3.0566 | -2.6756 | -0.0223 | TGTCAGGTGCGGGCCACATGATGTGJCGJACACACGTGCACCTGGGTTAAGCCTGAG          |
| NTRK2_P10_F         | NTRK2     | 3.36x10 <sup>-03</sup> | 4.17x10 <sup>-04</sup> | -3.6579 | -0.8657 | -0.0227 | TGACTCGGGAACAACAGATCCGAGCJCGJCAAAAAGGGAAGACGGATTCTCAG              |
| CPA4_P1265_R        | CPA4      | 5.28x10 <sup>-03</sup> | 7.54x10 <sup>-04</sup> | -3.4819 | -1.4217 | -0.0239 | CACGTACTCTCTGTTTCTTTGJCGJTAATTCAGTGTAAAGCACAGTAAGTCTTTCC           |
| FGR_P39_F           | FGR       | 5.58x10 <sup>-03</sup> | 8.00x10 <sup>-04</sup> | -3.4641 | -1.4768 | -0.0239 | GGCGGAACCTGGGCCACTACTGTACJCGJTTACAGTCTGCCTCACAGTATGTCCCC           |
| HDAC9_E38_F         | HDAC9     | 3.98x10 <sup>-04</sup> | 2.96x10 <sup>-05</sup> | -4.3884 | 1.6511  | -0.0246 | GAGGCACAGACACAGATAGGAAAGGACJCGJGCTGGAGCCACTTGCAGGACTG              |

Table S1. Continued.

| ID      | Gene name | adj.P.Val              | P-value                | t       | B       | logFC   | Sequence                                                            |
|---------|-----------|------------------------|------------------------|---------|---------|---------|---------------------------------------------------------------------|
| CDH17   | CDH17     | 3.63x10 <sup>-02</sup> | 1.02x10 <sup>-02</sup> | -2.6214 | -3.8183 | -0.0254 | CCAAAGTCTGCAAGAAAACAAC[CG]ATAGCAAAATTTCCCCCAAACAC                   |
| SLC22A2 | SLC22A2   | 1.18x10 <sup>-02</sup> | 2.10x10 <sup>-03</sup> | -3.1633 | -2.3732 | -0.0254 | CCAGGAAGACGATGCCCACTAGATGGG[CG]CGAAGGTAGCCGAGAGCAGAGCC<br>AAG       |
| BCL2A1  | BCL2A1    | 3.57x10 <sup>-03</sup> | 4.53x10 <sup>-04</sup> | -3.6340 | -0.9424 | -0.0257 | TGGGTGGCAGAGAACAAGGGCCCT[CG]AGGTGACTCTGGCAGTACCGCCC                 |
| IL1A    | IL1A      | 4.33x10 <sup>-03</sup> | 5.91x10 <sup>-04</sup> | -3.5550 | -1.1933 | -0.0265 | TTCTGTAGAAGAAGGTGTGTGCAAGCCC[CG]GGAGGTATCGTAAAGCCCTCAG              |
| CTLA4   | CTLA4     | 4.00x10 <sup>-03</sup> | 5.20x10 <sup>-04</sup> | -3.5931 | -1.0730 | -0.0293 | AAGCCATGGCTTGGATTTCAG[CG]GCACAAGGTCAGCTGAACCTGGCTACC                |
| THBS2   | THBS2     | 1.84x10 <sup>-02</sup> | 3.96x10 <sup>-03</sup> | -2.9532 | -2.9605 | -0.0295 | CTGTGCAGGGCTGTCAATCAGACACAC[CG]AGGAAGCACGTTTAATTCATTCCTTCG          |
| IL3     | IL3       | 3.40x10 <sup>-04</sup> | 2.42x10 <sup>-05</sup> | -4.4409 | 1.8440  | -0.0302 | CCAGAAACAAGTGTCAAGGAGAAGCTGCC[CG]JAAGCCCCATGGGACAAAACCCAC<br>TGG    |
| USP29   | USP29     | 8.39x10 <sup>-04</sup> | 7.52x10 <sup>-05</sup> | -4.1400 | 0.7592  | -0.0303 | TTTCTGTAAACCTAACTCCTGC[CG]TTACGCCCCACCAGCTCTAGGCC                   |
| SEMA3B  | SEMA3B    | 1.48x10 <sup>-02</sup> | 2.91x10 <sup>-03</sup> | -3.0563 | -2.6764 | -0.0314 | CTTGTGCCCAITCCACTCC[CG]CTGGCTGCCGCTCCAGCTGGTCCC                     |
| DMP1    | DMP1      | 3.81x10 <sup>-03</sup> | 4.90x10 <sup>-04</sup> | -3.6105 | -1.0175 | -0.0314 | ATACCATGTAGAGAGATGGGAGAGCTG[CG]CTTTGGGTAAAACAAGTTCCCTAATTT          |
| MKRN4   | MKRN4     | 2.98x10 <sup>-02</sup> | 7.62x10 <sup>-03</sup> | -2.7267 | -3.5555 | -0.0333 | CAGTGTGCATCTCCCTCTTT[CG]CTTAGTCCGTCAGTAAGCCCTCICAATTT               |
| SRC     | SRC       | 2.08x10 <sup>-03</sup> | 2.27x10 <sup>-04</sup> | -3.8342 | -0.2885 | -0.0340 | CCTTAGCCTCAGTTTATCAC[CG]JCAAGAGCTACCATTTCATCTAGCACAAACC             |
| NCL     | NCL       | 9.05x10 <sup>-04</sup> | 8.36x10 <sup>-05</sup> | -4.1113 | 0.6586  | -0.0340 | TAAAATCACCTCAGGCCGGG[CG]CGGTGGCTCAGATCCGCAATCCCA                    |
| EPS8    | EPS8      | 1.40x10 <sup>-02</sup> | 2.69x10 <sup>-03</sup> | -3.0822 | -2.6039 | -0.0346 | CACCCAGTCTGGCTGCACAGCT[CG]JTAACCCCTGCCCTTTGGCGGGCAA                 |
| TIMP3   | TIMP3     | 1.08x10 <sup>-06</sup> | 3.30x10 <sup>-08</sup> | -6.0179 | 8.2401  | -0.0368 | GAATCTCTCAAATCCACCA[CG]JATAGCCCTCAITCAACCTGGATCCT                   |
| EDNRB   | EDNRB     | 6.98x10 <sup>-05</sup> | 3.57x10 <sup>-06</sup> | -4.9243 | 3.6874  | -0.0386 | ATACCCGAATTAAGAAAAGAGAGGTTTAT[CG]GCCAGAAAGCATCGGCAAGACTC<br>CTG     |
| ITGA6   | ITGA6     | 3.11x10 <sup>-03</sup> | 3.71x10 <sup>-04</sup> | -3.6921 | -0.7555 | -0.0395 | TTAAAACAACCCATCCTTGACTTG[CG]TGACTTCTTCCACAAGCTCTCCTGGT              |
| SHB     | SHB       | 4.51x10 <sup>-09</sup> | 6.89x10 <sup>-11</sup> | -7.3503 | 14.2941 | -0.0402 | TGAGGAGGGAGAGTGGATTAAACA[CG]GAACCTGTCTAGTTTACAGCGTGGC               |
| AFF3    | AFF3      | 4.31x10 <sup>-02</sup> | 1.32x10 <sup>-02</sup> | -2.5270 | -4.0465 | -0.0411 | CCATACTCTCCTGGTTTTGTACAGG[CG]GTCTCTCACACTGGCAGGCTTCCATT             |
| ACTG2   | ACTG2     | 6.90x10 <sup>-04</sup> | 5.73x10 <sup>-05</sup> | -4.2135 | 1.0195  | -0.0437 | GCACGCAGGATTTCTTTCTCTGGGTA[CG]GAAAGGCAATTTCTTTCAGCTTTCATTGG         |
| PWCRI   | PWCRI     | 3.37x10 <sup>-02</sup> | 9.12x10 <sup>-03</sup> | -2.6622 | -3.7177 | -0.0460 | GAGAACTCAAAAGTCAATTTCTCAT[CG]GAACTGAGGTCCAGCAATGTGTCTCTCT           |
| FGF6    | FGF6      | 6.67x10 <sup>-06</sup> | 2.66x10 <sup>-07</sup> | -5.5431 | 6.2061  | -0.0461 | CGTTGCAGTAGAGCCTCCGCTGC[CG]JTTGATCCCAACCAATAGCCA                    |
| LCK     | LCK       | 1.42x10 <sup>-02</sup> | 2.73x10 <sup>-03</sup> | -3.0776 | -2.6168 | -0.0468 | GTGAAATGGGGCCAGAGGGCTCC[CG]JGGCTGGCAGGTAAGGAG                       |
| NOTCH1  | NOTCH1    | 5.76x10 <sup>-13</sup> | 4.59x10 <sup>-15</sup> | -9.3261 | 23.7781 | -0.0481 | GGCGAAGAAGAAAAGATAAATGGCC[CG]GAGAAAGCAACAGGAAACCAAAAC<br>CGA        |
| TNF     | TNF       | 4.62x10 <sup>-02</sup> | 1.43x10 <sup>-02</sup> | -2.4968 | -4.1179 | -0.0483 | ATGTGATGGACTCACAGGTGAGG[CG]CCAGACTGCTGCAGGGGAAAGCAA                 |
| ABCC2   | ABCC2     | 1.54x10 <sup>-02</sup> | 3.14x10 <sup>-03</sup> | -3.0311 | -2.7466 | -0.0487 | GTTGGGATGAAAAGGTTCATCTTTA[CG]GAGAACATCAGAAATGGTAGATAATCC            |
| CSF2    | CSF2      | 3.50x10 <sup>-02</sup> | 9.68x10 <sup>-03</sup> | -2.6404 | -3.7715 | -0.0493 | CAGTGGCCCTGACTGGCCA[CG]JCTGTGCAGCTTGATAACAATGACATTTTCTT             |
| FGF7    | FGF7      | 4.03x10 <sup>-02</sup> | 1.19x10 <sup>-02</sup> | -2.5658 | -3.9536 | -0.0511 | TGAGACTCTGGAAACAGCAGGTAACCTTGCC[CG]JAAGTCATACTGGTTCATTAGTGGT<br>CAA |
| SMO     | SMO       | 2.34x10 <sup>-05</sup> | 1.12x10 <sup>-06</sup> | -5.2056 | 4.8120  | -0.0511 | CCGAGTCTCTCCTTGCAGGTC[CG]GCCCAAGATTTCCACTCATCTC                     |
| LRRK1   | LRRK1     | 4.15x10 <sup>-02</sup> | 1.25x10 <sup>-02</sup> | -2.5456 | -4.0022 | -0.0516 | TTACCTGCGTGTCAAGCTCGGAAAG[CG]GAAAAGTGCAAGCTGATGAAGAT                |
| CSF1    | CSF1      | 3.98x10 <sup>-06</sup> | 1.46x10 <sup>-07</sup> | -5.6822 | 6.7935  | -0.0541 | TTTGTGAAAGGCTTGAAGTGCAG[CG]CAGAAAGACAGAGGGTGAAGTAGGAA               |
| IL13    | IL13      | 1.49x10 <sup>-02</sup> | 2.95x10 <sup>-03</sup> | -3.0516 | -2.6897 | -0.0543 | GGCCTCATGGCGCTTTTGTGTTGACCA[CG]JGTCAATGCTCTCACTTGCCTTGGCGGCTTT      |
| IL18BP  | IL18BP    | 3.94x10 <sup>-02</sup> | 1.14x10 <sup>-02</sup> | -2.5810 | -3.9169 | -0.0548 | TGGGAAAGCCAGGATGTGGA[CG]GACTGGTATGGCAITTAGGCCTG                     |

Table S1. Continued.

| ID              | Gene name | adj.P.Val              | P-value                | t        | B       | logFC   | Sequence                                                            |
|-----------------|-----------|------------------------|------------------------|----------|---------|---------|---------------------------------------------------------------------|
| FANCA_P1006_R   | FANCA     | 3.99x10 <sup>-02</sup> | 1.17x10 <sup>-02</sup> | -2.5723  | -3.9378 | -0.0581 | CCTCTGGCAGTGGCCCTTGGAAACCAC CG AAGGGATTTCAGCCGAAGGGC                |
| PTHR1_E36_R     | PTHR1     | 3.55x10 <sup>-02</sup> | 9.93x10 <sup>-03</sup> | -2.6311  | -3.7946 | -0.0606 | GGGACTATCCATGGCTCCCG GTGGCCAACTTGAGTCTGCTGCAGCTTTA                  |
| APBA2_P305_R    | APBA2     | 1.23x10 <sup>-04</sup> | 7.30x10 <sup>-06</sup> | -4.7467  | 2.9963  | -0.0612 | AGCATGCAGCTGTGCTACCTGTGGCC CG AAATCAITAGTTGTCCATACTCACTGA<br>CCT    |
| TMPRSS4_E83_F   | TMPRSS4   | 2.95x10 <sup>-02</sup> | 7.51x10 <sup>-03</sup> | -2.7318  | -3.5425 | -0.0635 | TTGCTCAGCGGACAAGGATGCTGGG CG TGAGGGACCAAGGCCTGCC                    |
| ITK_E166_R      | ITK       | 4.81x10 <sup>-02</sup> | 1.50x10 <sup>-02</sup> | -2.4784  | -4.1611 | -0.0652 | TCTCCCTCGAACTTAAAGTC CG TCTTTGTGTTAAACCAAGCCAGCCT                   |
| B3GALT5_P330_F  | B3GALT5   | 1.55x10 <sup>-02</sup> | 3.23x10 <sup>-03</sup> | -3.0222  | -2.7713 | -0.0654 | GGGGCAGTGCCTAGGCAGAGGG CG JGAGCCAGCAGATGGGATACACTCAG                |
| FGFR4_P610_F    | FGFR4     | 2.46x10 <sup>-04</sup> | 1.63x10 <sup>-05</sup> | -4.5428  | 2.2224  | -0.0658 | GAGTAGCAGGGTGGAGCCAGG CG JTGGGTCATGGCAATCTATGTATAAAG                |
| ZIM3_P718_R     | ZIM3      | 2.64x10 <sup>-02</sup> | 6.44x10 <sup>-03</sup> | -2.7861  | -3.4034 | -0.0658 | CCTCCAGGAGAAAGATCCAAAG CG JATTAGCA AATGACCCCTGGCGGGTG               |
| PLG_P370_F      | PLG       | 1.43x10 <sup>-04</sup> | 8.62x10 <sup>-06</sup> | -4.7049  | 2.8362  | -0.0662 | GAAGCTTAGGGAGGCTATGGA CG JTGACGGCTTGGCAGAGGGTCT                     |
| PTHLH_P757_F    | PTHLH     | 2.27x10 <sup>-02</sup> | 5.18x10 <sup>-03</sup> | -2.8621  | -3.2045 | -0.0684 | CCAAAGCTGCCCTGTTTATCTTTC CG JTAGAAATTCCTCAATATATACCCA               |
| CD1A_P414_R     | CD1A      | 3.44x10 <sup>-02</sup> | 9.40x10 <sup>-03</sup> | -2.6510  | -3.7454 | -0.0724 | AACATTGAAGTCAAATCTGGGCTGG CG JTACAITTAGTAGGAGGCCCAATTTAG            |
| LTA_P214_R      | LTA       | 4.57x10 <sup>-02</sup> | 1.41x10 <sup>-02</sup> | -2.5021  | -4.1055 | -0.0767 | CCTTCCCAGAACTCAGT CG JCTGAACCCCAAGCCTGTGGTTCTC                      |
| MAS1_P657_R     | MAS1      | 3.99x10 <sup>-02</sup> | 1.16x10 <sup>-02</sup> | -2.5730  | -3.9363 | -0.0770 | CCACACATCAATGGCTTGCCTGGCTTA CG JTAGTCTGAGCAGGTGCCAGCCTTTGT<br>CGC   |
| S100A4_P194_R   | S100A4    | 4.13x10 <sup>-02</sup> | 1.24x10 <sup>-02</sup> | -2.5498  | -3.9922 | -0.0771 | CCCGTGGTAAAGGGTAAGCCCTAG CG JTTACTAGCAGGGGACTGGAT                   |
| BTK_E64_R       | BTK       | 3.55x10 <sup>-02</sup> | 9.92x10 <sup>-03</sup> | -2.6317  | -3.7931 | -0.0773 | CAGGACTTGGAAAGTGGGACT CG ATCGCAGCAGACACTGGCCCTGGAG                  |
| ABC4_P51_F      | ABC4      | 3.12x10 <sup>-02</sup> | 8.16x10 <sup>-03</sup> | -2.7024  | -3.6170 | -0.0799 | TCTGTCTTTCCTCCTCTT CG JCTTTGTCCATTTGTCAAAAGCATGGCCTGG               |
| RHOC_P536_F     | RHOC      | 8.20x10 <sup>-19</sup> | 3.84x10 <sup>-21</sup> | -12.1965 | 37.6132 | -0.0811 | TCCTAGGATCGTACAGCCAA CG JTCATCCCCCAAATTGAAGACC                      |
| MAGEL2_P170_R   | MAGEL2    | 1.16x10 <sup>-02</sup> | 2.02x10 <sup>-03</sup> | -3.1759  | -2.3372 | -0.0817 | AGATGATGGAAGGCGAGTGCACAGCCTG CG JGGGCAGACAGTGGGCGAGACA              |
| PRDM2_P1340_R   | PRDM2     | 2.85x10 <sup>-02</sup> | 7.14x10 <sup>-03</sup> | -2.7500  | -3.4961 | -0.0826 | AGAAGTGGACTTCAGGCTGTCC CG JTCCTTCCACCCTTGGTTTGTGACTT                |
| HLA-DPA1_E35_R  | HLA-DPA1  | 3.36x10 <sup>-03</sup> | 4.16x10 <sup>-04</sup> | -3.6588  | -0.8628 | -0.0828 | CTCTGATATGGAACATTCGTCTTTCAGGG CG JCATGTTGTGGGGTCTATAATTGA           |
| CHI3L2_P226_F   | CHI3L2    | 4.05x10 <sup>-02</sup> | 1.20x10 <sup>-02</sup> | -2.5626  | -3.9613 | -0.0894 | TGATGAGGAAGGAGATTCAGGGC CG JAGGGTGTATACCAGGAGGCAGA                  |
| FANCE_P356_R    | FANCE     | 3.88x10 <sup>-02</sup> | 1.11x10 <sup>-02</sup> | -2.5889  | -3.8978 | -0.0904 | CATGACAAGCAACATGCCGTG CG JTAATAACAGCGGGTCTCTTAGCACA                 |
| MMP2_P197_F     | MMP2      | 2.73x10 <sup>-02</sup> | 6.78x10 <sup>-03</sup> | -2.7683  | -3.4493 | -0.0952 | GCGAGAGAGGCAAGTGGGGTGA CG JAGGTCTGTGCACTGAGGGTG                     |
| CSF3_E242_R     | CSF3      | 3.08x10 <sup>-02</sup> | 7.96x10 <sup>-03</sup> | -2.7110  | -3.5953 | -0.0964 | GGAACAGCATGTCTCTGAGCC CG JCTCTGTCCCAAGCCCTGCAGCTGCT                 |
| IL10_P348_F     | IL10      | 4.29x10 <sup>-02</sup> | 1.31x10 <sup>-02</sup> | -2.5299  | -4.0395 | -0.0971 | ATTCCGGTGTCTTAGGTCACAGTGA CG JTGACAAAATGCCCAATCCAGAATAC             |
| PEG3_E496_F     | PEG3      | 1.54x10 <sup>-02</sup> | 3.13x10 <sup>-03</sup> | -3.0326  | -2.7424 | -0.0980 | CATTGGTGTCCGACCTTGTCTGGACTTGG CG JTGCGAGAGCCCGGGCTGTCTGCC           |
| PDGFRB_P273_F   | PDGFRB    | 6.89x10 <sup>-04</sup> | 5.67x10 <sup>-05</sup> | -4.2160  | 1.0284  | -0.0997 | CTTAGAAAATCCACAGCCCA CG JCCAGCCCGCAGCTGTGAGTCACTTTT                 |
| GUCY2F_P255_F   | GUCY2F    | 1.70x10 <sup>-02</sup> | 3.63x10 <sup>-03</sup> | -2.9826  | -2.8803 | -0.1008 | CCATCTGTCTAATAACCAACAAT CG JCCCTTCTCCAGGACAGTCTTAATGC               |
| TNFRSF1A_P678_F | TNFRSF1A  | 2.23x10 <sup>-02</sup> | 5.04x10 <sup>-03</sup> | -2.8713  | -3.1803 | -0.1077 | TCCTGGCTCTGCCCAACAATCATG CG JACATCAGGCAACTCCTCTCCCTAAGC             |
| ARHGAP9_P260_F  | ARHGAP9   | 3.65x10 <sup>-02</sup> | 1.03x10 <sup>-02</sup> | -2.6178  | -3.8272 | -0.1080 | TAAAGTCCCTGTCTTTCAGACTGGATA CG JGCAAACTACCCTCTTCTCCACTAGTGCA<br>ATC |
| PXN_P308_F      | PXN       | 5.26x10 <sup>-10</sup> | 6.64x10 <sup>-12</sup> | -7.8378  | 16.5980 | -0.1158 | TCAAAGTCACTTGCCTGACCCCTG CG JGATGACAAAATCCGTCACAGTCAGC              |
| MFAP4_P197_F    | MFAP4     | 3.72x10 <sup>-04</sup> | 2.75x10 <sup>-05</sup> | -4.4080  | 1.7228  | -0.1169 | GACCACCTGTGTCTCAATTAGTCTGT CG JGGCAAAGTACTGCGAGACGTTAACTCCC<br>TGC  |
| AXL_P223_R      | AXL       | 8.01x10 <sup>-03</sup> | 1.23x10 <sup>-03</sup> | -3.3309  | -1.8816 | -0.1172 | GCCAGTAGCATGCCCTGCC CG JCTGGGTCCCTCTGCGTGTCTCTGCTTGTGTC             |
| HLA-DOB_E432_R  | HLA-DOB   | 2.06x10 <sup>-02</sup> | 4.55x10 <sup>-03</sup> | -2.9062  | -3.0871 | -0.1189 | AGGCTCGAACCAAGCCAAAGGCC TCAACA CG JCCCAGGCACACTGACTGAGGTTGAT        |

Table S1. Continued.

| ID              | Gene name | adj.P.Val              | P-value                | t      | B       | logFC   | Sequence                                                     |
|-----------------|-----------|------------------------|------------------------|--------|---------|---------|--------------------------------------------------------------|
| MMP14_P208_R    | MMP14     | 3.33x10 <sup>-04</sup> | 2.35x10 <sup>-05</sup> | 4.4490 | 1.8737  | -0.1223 | CTACAGCCCCCTGCTGTCCAT CG CGGGCCCTCAACCCCTGCAGATGGCA          |
| LMTK2_P1034_F   | LMTK2     | 4.13x10 <sup>-04</sup> | 3.13x10 <sup>-05</sup> | 4.3739 | 1.5981  | -0.1251 | TCTGTGTGCCAGTGTGTAAACATCAT CG ACAGCTGGCATTAGGATGGACA<br>TTT  |
| ZAP70_P220_R    | ZAP70     | 1.17x10 <sup>-02</sup> | 2.03x10 <sup>-03</sup> | 3.1732 | -2.3449 | -0.1268 | GGTATGCAGGGCTTCCCTCTTCTGA CG GTTCTGTGCTGGAGTCTCCTCCTGA       |
| EGF_P242_R      | EGF       | 1.35x10 <sup>-02</sup> | 2.54x10 <sup>-03</sup> | 3.1003 | -2.5528 | -0.1277 | CATAGCCAATATTTAGCAGTTCC CG CCATTCAACCATGAGCACCTCCAC          |
| SFTPC_E13_F     | SFTPC     | 4.08x10 <sup>-02</sup> | 1.22x10 <sup>-02</sup> | 2.5560 | -3.9773 | -0.1300 | CTACAGGGGGCTTATCTGGCT CG GTTCTGGAGGGCCAGGAACA                |
| KLK11_P1290_F   | KLK11     | 4.79x10 <sup>-03</sup> | 6.68x10 <sup>-04</sup> | 3.5186 | -1.3076 | -0.1340 | GGTCAGTTGTTCTCATGATCAT CG GATCCAGTCCACATATTCGAAATATAG        |
| UGT1A1_P564_R   | UGT1A1    | 3.88x10 <sup>-02</sup> | 1.12x10 <sup>-02</sup> | 2.5878 | -3.9005 | -0.1372 | TCTGGTCACTCATGGCGGTGCT CG GTGTGGGGCTCTGTCTGCAGCCTCAAG<br>ACC |
| KRT13_P676_F    | KRT13     | 1.08x10 <sup>-02</sup> | 1.83x10 <sup>-03</sup> | 3.2062 | -2.2494 | -0.1442 | GAAGTGGCCCTGTCCATTATCATAG CG AATATTCTCCGAGCCCTCACCATATA      |
| GABRA5_P1016_F  | GABRA5    | 4.96x10 <sup>-02</sup> | 1.56x10 <sup>-02</sup> | 2.4624 | -4.1983 | -0.1444 | TGGTAGAGAAATGAAAGCACCCACAGTGTGG CG GCTCTGGGAGTGCACCTGGC      |
| AIM2_E208_F     | AIM2      | 2.33x10 <sup>-02</sup> | 5.38x10 <sup>-03</sup> | 2.8491 | -3.2389 | -0.1445 | GGTGTACCTCTCTGATCCCTGGG CG ATCAGCAAAACCGGTCTGCCACC           |
| IL1B_P829_F     | IL1B      | 1.43x10 <sup>-02</sup> | 2.78x10 <sup>-03</sup> | 3.0716 | -2.6337 | -0.1502 | CAAGAGTTATCAGTTTCTTTAAAC CG AGACACCAGCAAAGTGCCTGCTCCA        |
| SLC14A1_E295_F  | SLC14A1   | 4.25x10 <sup>-02</sup> | 1.28x10 <sup>-02</sup> | 2.5361 | -4.0247 | -0.1515 | TCCTGGAAGCTCAAGGCATGCC CG GTTGATTTCTGAAGCAAGGTGCATGC         |
| TFDP1_P543_R    | TFDP1     | 7.91x10 <sup>-04</sup> | 6.84x10 <sup>-05</sup> | 4.1656 | 0.8494  | -0.1534 | TAGTGCACACACACAGTCCC CG CTCCCTCAGCTGCACATGCAC TAGTGA         |
| TFE2_P178_F     | TFE2      | 3.81x10 <sup>-02</sup> | 1.08x10 <sup>-02</sup> | 2.5987 | -3.8738 | -0.1550 | GCCAGGTGACTCTCTCCCTGCT CG GTGATACCTCTTCTGCCCTGGACAGA         |
| MMP7_P613_F     | MMP7      | 9.05x10 <sup>-03</sup> | 1.47x10 <sup>-03</sup> | 3.2760 | -2.0451 | -0.1560 | TGTGTCCCTCACCTTCC CG TCCCTTAGCAGAGCAGTGA TATCC               |
| APOC2_P377_F    | APOC2     | 7.97x10 <sup>-05</sup> | 4.19x10 <sup>-06</sup> | 4.8851 | 3.5336  | -0.1587 | GGGAAGGAAGAGTAGGAGGT CG GGAAGGTATCAAGGAATAACACC              |
| KLK10_P268_R    | KLK10     | 4.01x10 <sup>-02</sup> | 1.18x10 <sup>-02</sup> | 2.5684 | -3.9472 | -0.1607 | AACAGAAACAAGGAAAAGGAAACCC CG CCCACTCTGTGGCCGTGAGTGA          |
| FLJ20712_P984_R | FLJ20712  | 3.08x10 <sup>-02</sup> | 7.98x10 <sup>-03</sup> | 2.7101 | -3.5977 | -0.1623 | ACTGCTTGTGAGCCCAAGAAC CG GACAGGATACCTCCCTGCCAATCAC           |
| CD82_P557_R     | CD82      | 2.46x10 <sup>-04</sup> | 1.63x10 <sup>-05</sup> | 4.5437 | 2.2257  | -0.1630 | AAAGTTCCTGGCCAGG CG CCTCTGATAGAGGCCCGGACTTAGG                |
| LAT_E46_F       | LAT       | 2.53x10 <sup>-02</sup> | 6.09x10 <sup>-03</sup> | 2.8059 | -3.3521 | -0.1635 | GGTCTGGATATGGAGGCCA CG GCTGCCAGCTGGCAGGTGGC                  |
| OSM_P188_F      | OSM       | 3.99x10 <sup>-02</sup> | 1.16x10 <sup>-02</sup> | 2.5745 | -3.9326 | -0.1637 | CGCTCTCTCTCTGTTTCT CG AATTCGTTCTTCGAGGTACAGCCCTAC            |
| PADI4_E24_F     | PADI4     | 3.07x10 <sup>-02</sup> | 7.91x10 <sup>-03</sup> | 2.7133 | -3.5895 | -0.1643 | TCCTACAGCCAGGGGACGAGCTAGCCCGA CG ATGGCCCAAGGGGACATTGATC      |
| TFE1_P180_R     | TFE1      | 2.35x10 <sup>-03</sup> | 2.60x10 <sup>-04</sup> | 3.7946 | -0.4200 | -0.1677 | ATGGAAGGATTTGCTGATAGACAGAGA CG ACATGTGTGAGGTCAICTTGG         |
| NOTCH4_P938_F   | NOTCH4    | 3.44x10 <sup>-02</sup> | 9.39x10 <sup>-03</sup> | 2.6516 | -3.7440 | -0.1681 | CCTGAGAGCCTTCCCTAC CG GGGAATATACTTCAACCAGCACCACTTT           |
| CCL3_P543_R     | CCL3      | 3.27x10 <sup>-03</sup> | 3.93x10 <sup>-04</sup> | 3.6755 | -0.8090 | -0.1681 | ATGTAGTGACTAGGGCGTGTGTTAA CG CTAGTTGTGGATCAFAAAAATACTTT      |
| LCN2_P86_R      | LCN2      | 4.43x10 <sup>-02</sup> | 1.36x10 <sup>-02</sup> | 2.5148 | -4.0755 | -0.1725 | GCAGAAATCTTGCCAAAGT CG CAGGAGTTGTGGCAATTGCC CACATTC          |
| CSF3R_P472_F    | CSF3R     | 1.91x10 <sup>-02</sup> | 4.16x10 <sup>-03</sup> | 2.9366 | -3.0054 | -0.1734 | CTCACTGCTCCCTCTTCAATTA CG TATCTGTGCAATGCCCATAGACCAGGCA       |
| CD2_P68_F       | CD2       | 4.81x10 <sup>-02</sup> | 1.50x10 <sup>-02</sup> | 2.4772 | -4.1638 | -0.1740 | TGTAAAGAGAGGCACGTGTTAAGCTCT CG GGTGTGGACTCCACCAGTTC          |
| MC2R_P1025_F    | MC2R      | 3.54x10 <sup>-02</sup> | 9.84x10 <sup>-03</sup> | 2.6347 | -3.7857 | -0.1776 | AACATGCCCTGCAGCTGAAAACC CG GGTTCACACAGGCCCTCTTTCC            |
| CREB1_P819_F    | CREB1     | 1.53x10 <sup>-05</sup> | 7.03x10 <sup>-07</sup> | 5.3156 | 5.2615  | -0.1799 | TGTAGAAAACAGGGTGAAGGAAAAGAAAG CG ACACAGGATGTTGTCTGGAGAAA     |
| PTPRH_E173_F    | PTPRH     | 3.41x10 <sup>-02</sup> | 9.29x10 <sup>-03</sup> | 2.6555 | -3.7343 | -0.1802 | CAGCACCTACTTCCCTCAAGAT CG AGGTGCAGGCACCCAGCTCCTTCT           |
| PYCARD_P393_F   | PYCARD    | 8.63x10 <sup>-03</sup> | 1.38x10 <sup>-03</sup> | 3.2957 | -1.9867 | -0.1805 | CCAGCATAACATGGCCAACC CG ATGGCTCCCGAAAACCTTGGCCAGATGC         |
| KRT5_P308_F     | KRT5      | 4.17x10 <sup>-03</sup> | 5.48x10 <sup>-04</sup> | 3.5775 | -1.1223 | -0.1827 | GAGTATTGACAAACCATCCAGTA CG GTACATGCTGAGCACCTGCCCTTCCAG       |
| VAMP8_P241_F    | VAMP8     | 3.11x10 <sup>-02</sup> | 8.11x10 <sup>-03</sup> | 2.7045 | -3.6116 | -0.1832 | ATCAGGAGGTCCAGCCTCTTGAAAACCT CG GAGGGTCTGTGATCTT             |
| SFTPA1_P421_F   | SFTPA1    | 1.52x10 <sup>-02</sup> | 3.01x10 <sup>-03</sup> | 3.0447 | -2.7087 | -0.1847 | TGGGGTCAATGGCTGAGCCAGGT CG CAGGACAGACAAAGTTGGCCTGGA          |
| IL16_P93_R      | IL16      | 2.42x10 <sup>-02</sup> | 5.72x10 <sup>-03</sup> | 2.8277 | -3.2952 | -0.1854 | CTCATATTCAAAATACTCCACAG CG JAGAAGCTGCCATCGATCTCCCAATG        |



Table S1. Continued.

| ID              | Gene name | adj.P.Val              | P-value                | t        | B       | logFC   | Sequence                                                       |
|-----------------|-----------|------------------------|------------------------|----------|---------|---------|----------------------------------------------------------------|
| PTK6_E50_F      | PTK6      | 3.02x10 <sup>-02</sup> | 7.76x10 <sup>-03</sup> | -2.7201  | -3.5723 | -0.1862 | GGCCAGGTGAGCCTGGTCC[CGJGGACACACCATGGCGGGGGGGGGCAGC             |
| MPL_P62_F       | MPL       | 2.06x10 <sup>-02</sup> | 4.59x10 <sup>-03</sup> | -2.9035  | -3.0945 | -0.1866 | AGGGCAGGGACAGGGACAGGA[CGJTGCGGCTGTATCTGACAGGA                  |
| SPARC_P195_F    | SPARC     | 1.65x10 <sup>-03</sup> | 1.66x10 <sup>-04</sup> | -3.9223  | 0.0076  | -0.1891 | ACCTGCCCTGCATCTGTT[CGJGGGCTGTCCTAAACCGACTCACAGAG               |
| SPI1_P48_F      | SPI1      | 4.11x10 <sup>-02</sup> | 1.23x10 <sup>-02</sup> | -2.5526  | -3.9852 | -0.1917 | GTCCCTTGGGGTGACATCAC[CGJCCCAACCCGTTGCATAATCTC                  |
| CASP8_E474_F    | CASP8     | 6.12x10 <sup>-03</sup> | 9.03x10 <sup>-04</sup> | -3.4274  | -1.5895 | -0.1952 | CCTGGCCAGAGGCTGGGGT[CGJGGTCAAGACATCAGTAGAAGGAGG                |
| LEFTY2_P719_F   | LEFTY2    | 3.37x10 <sup>-02</sup> | 9.10x10 <sup>-03</sup> | -2.6628  | -3.7160 | -0.2000 | CTCTCCCACTGAGCTGGCTGGC[CGJGTTCAATGCCACAGCATCAGCTGG             |
| IL6_P213_R      | IL6       | 4.76x10 <sup>-02</sup> | 1.47x10 <sup>-02</sup> | -2.4843  | -4.1472 | -0.2023 | TCTGTCTTTAGCGGTAGCCTCAATGA[CGJACCTAAGCTGCACTTTCCCCCTAG         |
| PSCA_P135_F     | PSCA      | 2.21x10 <sup>-02</sup> | 4.99x10 <sup>-03</sup> | -2.8749  | -3.1706 | -0.2053 | AAGGAGAGGGAGGTGCAGGT[CGJCTCAGGGAGGAGACTCGGAC                   |
| SFTPB_P689_R    | SFTPB     | 4.67x10 <sup>-03</sup> | 6.48x10 <sup>-04</sup> | -3.5276  | -1.2795 | -0.2063 | GGTAGGGCTGGGGCATAAGCTG[CGJCCCTACCTTTGAGTCTCCCTAGAA             |
| MMP19_P306_F    | MMP19     | 4.82x10 <sup>-02</sup> | 1.51x10 <sup>-02</sup> | -2.4753  | -4.1683 | -0.2087 | CCTGGGCCAGCAATCACT[CGJCCCTACCTTTGAGTCTCCCTAGAA                 |
| MAGEC3_E307_F   | MAGEC3    | 2.51x10 <sup>-02</sup> | 5.98x10 <sup>-03</sup> | -2.8120  | -3.3361 | -0.2123 | TCCCTGGTTGCAGTAGCCTGTGGT[CGJCTCATGTCATGTAATCTCCAGGAA           |
| NAT2_P11_F      | NAT2      | 3.36x10 <sup>-02</sup> | 9.04x10 <sup>-03</sup> | -2.6652  | -3.7103 | -0.2130 | AAC TAGACTTGGTGTGAGGTGATA[CGJGAATCCAGTGAGATCACTTCCCT           |
| ZNFN1A1_E102_F  | ZNFN1A1   | 3.81x10 <sup>-02</sup> | 1.09x10 <sup>-02</sup> | -2.5972  | -3.8775 | -0.2133 | GGAGGATTAACG AATGCTTGATGCC[CGJGGAGAGAAA AATGAATGGCT            |
| LMO2_E148_F     | LMO2      | 3.38x10 <sup>-02</sup> | 9.17x10 <sup>-03</sup> | -2.6603  | -3.7224 | -0.2152 | CGGAGCCTCACCCCTTGAC[CGJAGCTCTTCACACCAGATGCTCTGCCGT             |
| GLI2_E90_F      | GLI2      | 2.95x10 <sup>-02</sup> | 7.47x10 <sup>-03</sup> | -2.7340  | -3.5370 | -0.2172 | AAGAAAGTATGATGCGATGTTAAA[CGJTTCAAGGCACCCGATCTGTGATCAAGA        |
| SERPINE1_E189_R | SERPINE1  | 7.11x10 <sup>-06</sup> | 2.88x10 <sup>-07</sup> | -5.5246  | 6.1285  | -0.2174 | CGTATTCCTCTATTTTCTTCC[CGJAGCCTGCAGCCTGGGTCGACCCCTGC            |
| MMP9_E88_R      | MMP9      | 2.64x10 <sup>-02</sup> | 6.41x10 <sup>-03</sup> | -2.7877  | -3.3993 | -0.2176 | CTGCTTGTGCTGCCCCAGACAG[CGJCCAGTCCACCCCTTGCTCTTCCC              |
| MUC1_P191_F     | MUC1      | 1.54x10 <sup>-02</sup> | 3.18x10 <sup>-03</sup> | -3.0272  | -2.7575 | -0.2190 | CTCAAACCCCTGACTACC[CGJTTGTTCTCCAGCTGGCCCTCCCC                  |
| SLC22A18_P216_R | SLC22A18  | 4.13x10 <sup>-02</sup> | 1.24x10 <sup>-02</sup> | -2.5480  | -3.9964 | -0.2200 | GTCAGCCTGGATCTCTCATC[CGJGACAGAACTGTGCGCTTGTCTCTGAAGCG          |
| MBD2_P233_F     | MBD2      | 5.59x10 <sup>-03</sup> | 8.05x10 <sup>-04</sup> | -3.4621  | -1.4829 | -0.2214 | GGGTGATAGCCCCCTTTCC[CGJCCCTCTGCACA AAGCTTGCAGGGGA              |
| C4B_P191_F      | C4B       | 6.12x10 <sup>-03</sup> | 9.03x10 <sup>-04</sup> | -3.4274  | -1.5896 | -0.2220 | CTCAGGCACCTGGAATGAGAGGAGTTAA[CGJGGGAAAGGACAGGGTATTT            |
| TRPM5_P721_F    | TRPM5     | 3.12x10 <sup>-02</sup> | 8.20x10 <sup>-03</sup> | -2.7006  | -3.6216 | -0.2234 | GGCTCATGTCTCCAGCTGCC[CGJGTGAGGTCGGGCACTCAGCCCCCT               |
| HBII-52_E142_F  | HBII-52   | 3.24x10 <sup>-02</sup> | 8.65x10 <sup>-03</sup> | -2.6814  | -3.6696 | -0.2258 | GGCCCCGACGGGGCCACTGTATTT[CGJGGCTGCAGACCTAGAGGCCCTG             |
| WNT8B_E487_F    | WNT8B     | 9.17x10 <sup>-03</sup> | 1.50x10 <sup>-03</sup> | -3.2688  | -2.0662 | -0.2301 | GGGTAAATGGACAGCAGCCCTTTTCA[CGJAAATCCTGATGTCAGCATGTAGAGAG       |
| SPP1_P647_F     | SPP1      | 1.73x10 <sup>-02</sup> | 3.71x10 <sup>-03</sup> | -2.9756  | -2.8993 | -0.2317 | GGGAACAAAGATAGGTAGGCTGGG[CGJATTTGCCCAAGGTTGCACAGGTCAGCA        |
| MMP3_P55_F      | MMP3      | 1.90x10 <sup>-03</sup> | 1.99x10 <sup>-04</sup> | -3.8702  | -0.1680 | -0.2331 | AGAGTGACAGTGTGTTTGGATCACCC[CGJAGCTTGACTCATCTTGTCTTCAATC        |
| IL12B_E25_F     | IL12B     | 4.47x10 <sup>-03</sup> | 6.17x10 <sup>-04</sup> | -3.5422  | -1.2337 | -0.2352 | GAAGTGCTTACCTTGTCTCTGGGCAAGG[CGJGAGAGTCCAATGGCCCTGAAACAGAT     |
| HLA-DQA2_E93_F  | HLA-DQA2  | 4.43x10 <sup>-02</sup> | 1.36x10 <sup>-02</sup> | -2.5156  | -4.0735 | -0.2373 | AGCTCTGCTGTGGGGGCCCT[CGJCCCTGACTGCCGTGATGAGGCC                 |
| IFNG_P188_F     | IFNG      | 3.77x10 <sup>-02</sup> | 1.07x10 <sup>-02</sup> | -2.6043  | -3.8601 | -0.2376 | CCTTTAGACTCTTGGTCTTTTGA[CGJATGAGACAGACCCCATATGCCCCACC          |
| EMR3_P1297_R    | EMR3      | 1.33x10 <sup>-02</sup> | 2.51x10 <sup>-03</sup> | -3.1050  | -2.5396 | -0.2379 | TGATTTACACAGGAACCGAGAGATTGGT[CGJGACTGGGTGTGCTGTTTG             |
| IRF7_E236_R     | IRF7      | 4.28x10 <sup>-08</sup> | 7.96x10 <sup>-10</sup> | -6.8320  | 11.8892 | -0.2396 | CGTCAGGGGGGGTCCAGCTCC[CGJGGAAAACCGAAACCTAAACACAGTGG            |
| AGXT_P180_F     | AGXT      | 7.12x10 <sup>-03</sup> | 1.08x10 <sup>-03</sup> | -3.3725  | -1.7566 | -0.2429 | GAGCTAAGCAGAATAAGAGGGGCTGGA[CGJTGACAGGACTCAGAGTGGGAGCG         |
| NGFR_P355_F     | NGFR      | 2.94x10 <sup>-03</sup> | 3.41x10 <sup>-04</sup> | -3.7166  | -0.6758 | -0.2439 | CTCCAGGGGAAAGGTGAAGCCACAGAGG[CGJGAGGAAGATGGGTAAGAGA            |
| CDK2_P330_R     | CDK2      | 1.87x10 <sup>-26</sup> | 2.49x10 <sup>-29</sup> | -16.3381 | 56.2196 | -0.2453 | AGGCCAGGATTCCTTTTGCAA[CGJAGATTCGCCGGCTTCCCTGGTTTCCA            |
| MKRN3_P108_F    | MKRN3     | 2.82x10 <sup>-02</sup> | 7.02x10 <sup>-03</sup> | -2.7560  | -3.4807 | -0.2515 | AAGACCAAAGAAAACGGCGCCTTGTCAAC[CGJACGGAATTGAAA AAGCTTCCCTG      |
| MMP8_E89_R      | MMP8      | 1.24x10 <sup>-02</sup> | 2.23x10 <sup>-03</sup> | -3.1437  | -2.4295 | -0.2545 | CTGCACATGGAGTAAGAGCAGAAATGGAAG[CGJCTTCCAGGGAGAACATGATCT<br>TCT |
| AOC3_P890_R     | AOC3      | 1.17x10 <sup>-02</sup> | 2.04x10 <sup>-03</sup> | -3.1720  | -2.3484 | -0.2568 | AATCCTGTGGCCTGCCTCCC[CGJACCTGGCAGCCCTGTGTCCCGGACTTAC           |

Table S1. Continued.

| ID             | Gene name | adj.P.Val              | P-value                | t        | B       | logFC   | Sequence                                                           |
|----------------|-----------|------------------------|------------------------|----------|---------|---------|--------------------------------------------------------------------|
| KRT1_P798_R    | KRT1      | 2.83x10 <sup>-03</sup> | 3.24x10 <sup>-04</sup> | -3.7315  | -0.6271 | -0.2611 | TTGAGTGAAAAAGCCACAGAGCAGTGAGA CG AGTAAATAGAAAGCTCTAGGACA<br>TTTTG  |
| CCR5_P630_R    | CCR5      | 2.14x10 <sup>-05</sup> | 9.93x10 <sup>-07</sup> | -5.2337  | 4.9264  | -0.2620 | ACTTCTAAACACCAATTACATTGGGATT CG AATTTCAACATGAATTTTTGGGGAACA<br>CAA |
| LTB4R_E64_R    | LTB4R     | 4.31x10 <sup>-03</sup> | 5.79x10 <sup>-04</sup> | -3.5615  | -1.1730 | -0.2663 | CTGAACCTGACTTCAGTCTTGCTG CG GTTTCTGCCCAATTTTTTCATATCCT             |
| ACVR1_P983_F   | ACVR1     | 1.54x10 <sup>-02</sup> | 3.18x10 <sup>-03</sup> | -3.0268  | -2.7586 | -0.2692 | GTAAGCACTGGCCTCTCGGGTCT CG CCTTCTATGTCCCACTTGCAGGG                 |
| MPO_E302_R     | MPO       | 9.55x10 <sup>-03</sup> | 1.57x10 <sup>-03</sup> | -3.2546  | -2.1079 | -0.2701 | GGAGCAGCACCTTCAGAGGGCTGGGG CG TGGCCAGAAATGGCCAGGAGCCC              |
| PI3_P1394_R    | PI3       | 8.63x10 <sup>-03</sup> | 1.38x10 <sup>-03</sup> | -3.2956  | -1.9868 | -0.2706 | AAAGGCTCCACAGTCTGACAT CG TTATGTCTCCCTCAGTTTCAGGCTTGG               |
| GSTM2_P453_R   | GSTM2     | 9.03x10 <sup>-08</sup> | 1.86x10 <sup>-09</sup> | -6.6496  | 11.0563 | -0.2783 | CCTTGCCTGTGTGTCCCTTCCCA CG TTAGGTCTGTCATGCCACGTATGTCCGCAG          |
| TJP2_P518_F    | TJP2      | 1.14x10 <sup>-04</sup> | 6.30x10 <sup>-06</sup> | -4.7837  | 3.1394  | -0.2810 | GCTGAGAAATGTGGGTACAAAGG CG TGTATGTGTGGTTAGCCGGG                    |
| TNFSF8_P184_F  | TNFSF8    | 1.06x10 <sup>-02</sup> | 1.79x10 <sup>-03</sup> | -3.2136  | -2.2278 | -0.2833 | CACACACAAAGCAACTTCTGTT CG TTTAGACTCTGCCACAAAACGCCCTTC              |
| PGR_P790_F     | PGR       | 1.33x10 <sup>-02</sup> | 2.47x10 <sup>-03</sup> | -3.1105  | -2.5240 | -0.2838 | CACTAGCAGTTATCCACATTT CG CCTAAATCTCCAGCAGCCACTAATAT                |
| FAS_P322_R     | FAS       | 1.41x10 <sup>-06</sup> | 4.70x10 <sup>-08</sup> | -5.9389  | 7.8964  | -0.2901 | CATATGGTTAACTGTCCATTCCAGAAA CG TCTGTGAGCCTCTCATGTTCAGGCCAC<br>AAC  |
| HLA-DPB1_E2_R  | HLA-DPB1  | 1.33x10 <sup>-02</sup> | 2.49x10 <sup>-03</sup> | -3.1080  | -2.5312 | -0.2957 | TTCAAACAGGAGCTCCCTTAG CG AGTCTTCTTTTCTGACTGCAGCTCTTTT              |
| DSG1_P159_R    | DSG1      | 1.32x10 <sup>-02</sup> | 2.43x10 <sup>-03</sup> | -3.1152  | -2.5105 | -0.2992 | CCCATCACCTGTATAACCTT CG GTATTTCTGTTCACCTTAAAGAGCCTGCCAC            |
| VAV1_P317_F    | VAV1      | 8.49x10 <sup>-03</sup> | 1.34x10 <sup>-03</sup> | -3.3047  | -1.9599 | -0.3057 | TGGAGTCAGAAAGACCAGCTGAGTATG CG GGGTGGACCAGACAGAGGA                 |
| STAT5A_E42_F   | STAT5A    | 1.38x10 <sup>-02</sup> | 2.64x10 <sup>-03</sup> | -3.0888  | -2.5853 | -0.3072 | TGCTGTGGCAAGGCCTGTAGAGAGTT CG AAGTTAGGAGGACTCAAGACGGT              |
| SPDEF_P6_R     | SPDEF     | 7.91x10 <sup>-04</sup> | 6.89x10 <sup>-05</sup> | -4.1638  | 0.8433  | -0.3131 | TGTCTGGGAGGAAGTCAGACAGCC CG AGATGAAGAGTTGGCCAGGGC                  |
| FGFR2_P460_R   | FGFR2     | 1.68x10 <sup>-06</sup> | 5.71x10 <sup>-08</sup> | -5.8951  | 7.7067  | -0.3150 | GAGACTTTAAAATGGCCCTGTGTGATACT CG GGGAGGGTTGCCAGGCAG                |
| NOS2A_P288_R   | NOS2A     | 1.78x10 <sup>-03</sup> | 1.84x10 <sup>-04</sup> | -3.8938  | -0.0888 | -0.3166 | AGGTGGCTGCTAAGATAGAGGCCACCA CG GAGCCAGGTTTTATTTGGCCAAAGCC          |
| CD86_P3_F      | CD86      | 4.24x10 <sup>-03</sup> | 5.63x10 <sup>-04</sup> | -3.5695  | -1.1477 | -0.3284 | AAGTTAGCTGGGTAGGTATACAGTCA CG GAGGAAAGGCTTGCACAGGGTG               |
| GFAP_P1214_F   | GFAP      | 1.86x10 <sup>-03</sup> | 1.94x10 <sup>-04</sup> | -3.8779  | -0.1421 | -0.3368 | CCTGGAGACTTCAAGTCCATCTA CG CCCTCCACTCTGGTCCCAACAGG                 |
| RIPK3_P24_F    | RIPK3     | 1.12x10 <sup>-02</sup> | 1.92x10 <sup>-03</sup> | -3.1911  | -2.2931 | -0.3633 | TCCGGTTGTACCCCTTTTTC CG AGTTGACTGAACAACCTTCCCTTATAAGCCGC           |
| ALPL_P433_F    | ALPL      | 6.02x10 <sup>-11</sup> | 6.40x10 <sup>-13</sup> | -8.3193  | 18.9031 | -0.3641 | GAGAGACAGGGACACGTGGGCAGAGA CG GATAAAGACAGAGACCCAGAGAAA<br>GCC      |
| CASP10_E139_F  | CASP10    | 1.50x10 <sup>-04</sup> | 9.38x10 <sup>-06</sup> | -4.6837  | 2.7552  | -0.3692 | TTTGTTTTCAGGCAATTTCCCTGAGAA CG TTTACTTCCAGAAGATTGGTGGAG            |
| HDAC1_P414_R   | HDAC1     | 3.54x10 <sup>-04</sup> | 2.59x10 <sup>-05</sup> | -4.4237  | 1.7804  | -0.3798 | CCTCCTTTGGGGCCACAAAAC CG CTTTCTAAACCCAGGTTCAAGCCCT                 |
| PRSS1_P1249_R  | PRSS1     | 1.30x10 <sup>-03</sup> | 1.27x10 <sup>-04</sup> | -3.9955  | 0.2572  | -0.3830 | TAGCCCTGGCCAGGTC CG ATTTCAACACCAAGTTTCTGAGCTTTT                    |
| SH3BP2_E18_F   | SH3BP2    | 6.75x10 <sup>-22</sup> | 1.79x10 <sup>-24</sup> | -13.8286 | 45.1908 | -0.3868 | GGTCCAGCCGGGTGACCCAGGC CG AGGCCGGCAGAAAGACAGCCTGAT                 |
| S100A2_P1186_F | S100A2    | 2.09x10 <sup>-04</sup> | 1.36x10 <sup>-05</sup> | -4.5893  | 2.3973  | -0.3932 | TCTACACCTTGGCACAGCCAC CG AGTGTCCCTTGTCCCTCAGTACTT                  |
| TNFSF10_P2_R   | TNFSF10   | 8.60x10 <sup>-04</sup> | 7.77x10 <sup>-05</sup> | -4.1311  | 0.7279  | -0.4161 | TCTTTATAGTCAAGTGAAGAAATGAAAG CG AATGAGTTGTTTTCTGGGT                |
| TRIP6_P1090_F  | TRIP6     | 1.24x10 <sup>-09</sup> | 1.73x10 <sup>-11</sup> | -7.6396  | 15.6571 | -0.4211 | AAGGGGACTTTGTGAACAGTGGG CG GGGAGACGCAGAGGCAGAGG                    |
| JAK3_P1075_R   | JAK3      | 1.00x10 <sup>-06</sup> | 2.93x10 <sup>-08</sup> | -6.0449  | 8.3583  | -0.4220 | GGACAGGCACAGACTTGAAC CG AGGCAAGGACAGGAGGAGCTGGC                    |
| IL8_P83_F      | IL8       | 1.30x10 <sup>-03</sup> | 1.26x10 <sup>-04</sup> | -3.9985  | 0.2675  | -0.4397 | AGGGGATGGGCCATCAGTTGCAAA CG TGGAAATTTCCCTCTGACATAATGAAA            |

adj.P.Val, adjusted P-value; t, the t value of the expression values of the two groups to be compared after t test; B, the logarithmic value of the standard deviation obtained by Bayesian adjustment.
